# Supplementary material
Source: PubMed Central journal article supplement (PMC4793851)

## Online Supplement

**Supplementary table A.** Details of MeSH Search Terms

| <b>Treatment</b>                 | <b>MeSH terms</b>                                                                                                          |
|----------------------------------|----------------------------------------------------------------------------------------------------------------------------|
| Unfractionated Heparin           | Heparin, Randomized controlled trial or Controlled clinical trial                                                          |
| Low-molecular-weight Heparin     | Low-molecular-weight heparin, Enoxaparin, Dalteparin, Nadroparin, Randomized controlled trial or Controlled clinical trial |
| Bivalirudin                      | Bivalirudin, Randomized controlled trial or Controlled clinical trial                                                      |
| Fondaparinux                     | Fondaparinux, Randomized controlled trial or Controlled clinical trial                                                     |
| Glycoprotein IIb/IIIa inhibitors | Abciximab, Tirofiban, Eptifibatide, Randomized controlled trial or Controlled clinical trial                               |

**Supplementary table B.** Anticoagulant and their mechanism of action

| <b>Study groups</b> | <b>Mechanism of action</b>                                                                                                                                 |
|---------------------|------------------------------------------------------------------------------------------------------------------------------------------------------------|
| Bivalirudin         | A direct thrombin inhibitor                                                                                                                                |
| Fondaparinux        | A synthetic pentasaccharide factor Xa inhibitor                                                                                                            |
| GPI                 | Inhibits the <u>GpIIb/IIIa</u> receptor on the surface of the <u>platelets</u> and thus prevents <u>platelet</u> aggregation and <u>thrombus</u> formation |
| LMWH and UFH        | Binds to and activates antithrombin III which inactivates thrombin and factor Xa and thus acts as an indirect thrombin inhibitor                           |

GPI=Glycoprotein IIb/IIIa inhibitors; LMWH=Low molecular weight heparin; UFH=Unfractionated heparin

**Supplementary table C.** Baseline characteristics of the included trials□

| <b>Trial</b>                  | <b>Year</b> | <b>Study</b>     | <b>Treatment</b>                                                                                                                                                                           | <b>Comparison</b>                                                                                                                                                                                                    | <b>Sample Size</b> |
|-------------------------------|-------------|------------------|--------------------------------------------------------------------------------------------------------------------------------------------------------------------------------------------|----------------------------------------------------------------------------------------------------------------------------------------------------------------------------------------------------------------------|--------------------|
| <b>ACE</b> <sup>1,2</sup>     | 2003        | UFH + GPI vs UFH | Abciximab 0.25 mg/kg IV bolus, then 0.125 mcg/kg/min for 12 hours + UFH 70 IU/kg IV bolus, with additional boluses during PCI to achieve ACT of 200-300 s                                  | UFH 70U/kg IV bolus, with additional boluses during PCI to achieve ACT of at least 300 secs, then UFH infusion for 48 hours                                                                                          | 400                |
| <b>ADMIRAL</b> <sup>3,4</sup> | 2001        | UFH + GPI vs UFH | Abciximab 0.25 mg/kg IV bolus, then 0.125 mcg/kg/min for 12 hours + UFH 70 IU/kg IV bolus, with additional boluses during PCI to achieve ACT of 200 s then 7 IU/kg/h infusion for 24 hours | UFH 70 IU/kg IV bolus, with additional boluses during PCI to achieve ACT of 200 s then 7 IU/kg/h infusion for 24 hours                                                                                               | 300                |
| <b>ASSIST</b> <sup>5</sup>    | 2009        | UFH + GPI vs UFH | Eptifibatide 180 mcg/kg IV bolus x2, then 2 mcg/kg/min infusion for 16 hours + UFH 60 IU/kg IV bolus (max 4000 IU), with additional boluses during PCI to achieve ACT 200 s                | UFH 60 IU/kg IV bolus (max 4000 IU), with additional boluses during PCI to achieve ACT > 250 s                                                                                                                       | 400                |
| <b>ATOLL</b> <sup>6</sup>     | 2011        | LMWH vs UFH      | Enoxaparin 0.5 mg/kg IV bolus                                                                                                                                                              | If patient received GPI: UFH 50 - 70 IU/kg IV bolus; If patient did not receive GPI: UFH 70 - 100 IU/kg IV bolus administered, with additional boluses during PCI to achieve ACT 200-300 s or 300-350s respectively. | 910                |

| <b>Trial</b>                                      | <b>Year</b> | <b>Study</b>                                 | <b>Treatment</b>                                                                                                                           | <b>Comparison</b>                                                                    | <b>Sample Size</b> |
|---------------------------------------------------|-------------|----------------------------------------------|--------------------------------------------------------------------------------------------------------------------------------------------|--------------------------------------------------------------------------------------|--------------------|
| <b>BRAVE-3</b> <sup>7,8</sup>                     | 2009        | UFH + GPI vs UFH                             | Abciximab 0.25 mg/kg IV bolus, then 0.125 mcg/kg/min for 12 hours + UFH 60 IU/kg IV bolus (max 5000 IU)                                    | UFH 60 IU/kg initial IV bolus (max 5000U) with additional 70 IU/kg IV bolus          | 800                |
| <b>BRAVE-4</b> <sup>9,10</sup>                    | 2014        | Bivalirudin + Prasugrel vs UFH + Clopidogrel | Bivalirudin 0.75 mg/kg IV bolus, then 1.75 mg/kg/h infusion through PCI + Prasugrel 60 mg LD, then 10 mg/d for at least 30 days            | UFH 70-100 IU/kg IV bolus + Clopidogrel 600 mg LD then ≥75 mg/d for at least 30 days | 548                |
| <b>BRIGHT</b> <sup>11</sup>                       | 2014        | Bivalirudin vs UFH                           | Bivalirudin 0.75 mg/kg IV bolus, then 1.75 mg/kg/h infusion through PCI                                                                    | UFH 100 IU/kg IV bolus pre-PCI                                                       | 1452               |
| <b>BRIGHT</b> <sup>11</sup>                       | 2014        | UFH + GPI vs UFH                             | Tirofiban 10 mcg/kg IV bolus, then 0.15 mcg/kg/min infusion through PCI + UFH 60 IU/kg IV bolus pre-PCI                                    | UFH 100 IU/kg IV bolus pre-PCI                                                       | 1450               |
| <b>CADILLAC (STEMI subgroup)</b> <sup>12,13</sup> | 2002        | UFH + GPI vs UFH                             | Abciximab 0.25 mg/kg IV bolus, then 0.125 mcg/kg/min for 12 hours + UFH 5000 IU IV bolus, with additional boluses to achieve ACT 200-300 s | UFH 5000 IU IV bolus, with additional boluses to achieve ACT of at least 350 s       | 1725               |
| <b>DEBATER</b> <sup>14</sup>                      | 2012        | UFH + GPI vs UFH                             | Abciximab 0.25 mg/kg IV bolus, then 0.125 mcg/kg/min for 12 hours + UFH 5000 IU IV bolus in the ambulance, additional 5000 IU before PCI   | UFH 5000 IU IV bolus in the ambulance, additional 5000 IU before PCI                 | 873                |

| <b>Trial</b>                          | <b>Year</b> | <b>Study</b>             | <b>Treatment</b>                                                                                                                                         | <b>Comparison</b>                                                                                                                                                                                                                         | <b>Sample Size</b> |
|---------------------------------------|-------------|--------------------------|----------------------------------------------------------------------------------------------------------------------------------------------------------|-------------------------------------------------------------------------------------------------------------------------------------------------------------------------------------------------------------------------------------------|--------------------|
| <b>EUROMAX<sup>15</sup></b>           | 2013        | Bivalirudin vs UFH/LMWH  | Bivalirudin 0.75 mg/kg IV bolus, then 1.75 mg/kg/h infusion through PCI; 0.25 mg/kg/h (or optional 1.75 mg/kg/h) infusion post-PCI for at least 4 hours  | UFH 60 IU/kg IV bolus if received GPI (UFH 100 IU/kg if not received GPI) or Enoxaparin 0.5 mg/kg IV bolus                                                                                                                                | 2198               |
| <b>Fu XH et al<sup>16</sup></b>       | 2008        | UFH + GPI vs UFH         | Tirofiban 10 mcg/kg IV bolus, then 0.15 mcg/kg/min infusion for 24 hours + UFH 70 IU/kg IV bolus with additional boluses during PCI to achieve ACT 250 s | UFH 70 IU/kg IV bolus with additional boluses during PCI to achieve ACT 250 s                                                                                                                                                             | 150                |
| <b>HEAT-PPCI<sup>17</sup></b>         | 2014        | Bivalirudin vs UFH       | Bivalirudin 0.75 mg/kg IV bolus, then 1.75 mg/kg/h infusion through PCI                                                                                  | UFH 70 IU/kg IV bolus pre-PCI                                                                                                                                                                                                             | 1829               |
| <b>HORIZONS - AMI<sup>18,19</sup></b> | 2008        | Bivalirudin vs UFH + GPI | Bivalirudin 0.75 mg/kg IV bolus, then 1.75 mg/kg/h infusion through PCI                                                                                  | UFH 60 IU/kg IV bolus, with additional boluses to achieve ACT of 200-250 s + GPI (Abciximab 0.25 mcg/kg IV bolus, then 0.125 mcg/kg/min for 12 hours; or Eptifibatide 180 mcg/kg IV bolus x2, then 2 mcg/kg/min infusion for 12-18 hours) | 3602               |
| <b>ISAR-2<sup>20,21</sup></b>         | 2000        | UFH + GPI vs UFH         | Abciximab 0.25 mg/kg IV bolus, then 10 mcg/min infusion for 12 hours + UFH 5000 IU IV bolus and addition 2500 U IV bolus at the time of PCI              | UFH 5000 IU IV bolus and addition 10000 IU IV bolus at the time of PCI, then 1000 IU/h infusion for 12 hours                                                                                                                              | 401                |

| <b>Trial</b>                                      | <b>Year</b> | <b>Study</b>            | <b>Treatment</b>                                                                                                                                                 | <b>Comparison</b>                                                                                                                               | <b>Sample Size</b> |
|---------------------------------------------------|-------------|-------------------------|------------------------------------------------------------------------------------------------------------------------------------------------------------------|-------------------------------------------------------------------------------------------------------------------------------------------------|--------------------|
| <b>ITTI</b> <sup>22</sup>                         | 2012        | UFH + GPI vs UFH        | Tirofiban 10 mcg/kg IV bolus, then 0.15 mcg/kg/min infusion for 24 hours + UFH 100 IU/kg IV bolus with additional boluses during PCI to achieve ACT of 250–300 s | UFH 100 IU/kg IV bolus with additional boluses during PCI to achieve ACT of >300 s                                                              | 100                |
| <b>Li WM et al</b> <sup>23</sup>                  | 2011        | LMWH + GPI vs UFH + GPI | Dalteparin 100 IU/kg IV bolus + Tirofiban 10 mcg/kg IV bolus, then 0.15 mcg/kg/min infusion for 36 hours                                                         | UFH 5000 IU IV bolus with additional boluses according to ACT values + Tirofiban 10 mcg/kg IV bolus, then 0.15 mcg/kg/min infusion for 36 hours | 120                |
| <b>Neumann FJ et al</b> <sup>24</sup>             | 1998        | UFH + GPI vs UFH        | Abciximab 0.25 mg/kg IV bolus, then 10 mcg/min infusion for 12 hours + UFH 5000 IU IV bolus pre-PCI and additional 25000 IU during PCI                           | UFH 5000 IU IV bolus pre-PCI and additional 10000 IU during PCI, then 1000 IU/h infusion for 12 hours                                           | 200                |
| <b>OASIS-6 (Primary PCI cohort)</b> <sup>25</sup> | 2006        | LMWH vs UFH             | Fondaparinux 2.5 mg IV bolus if received GPI (5 mg IV bolus if not received GPI), then 2.5 mg SQ daily for 8 days                                                | UFH 65 IU/kg IV bolus if received GPI (100 IU/kg bolus if not received GPI), then 12 IU/kg/h infusion for 45 hours                              | 3789               |
| <b>On-TIME 2</b> <sup>26,27</sup>                 | 2010        | UFH + GPI vs UFH        | Tirofiban 25 mcg/kg IV bolus, then 0.15 mcg/kg/min infusion + UFH 5000 IU IV bolus with additional 2500 IU boluses during PCI to achieve ACT of at least 200 s   | UFH 5000 IU IV bolus with additional 2500 IU boluses during PCI to achieve ACT of at least 200 s                                                | 1398               |

| <b>Trial</b>                       | <b>Year</b> | <b>Study</b>     | <b>Treatment</b>                                                                                                                                                 | <b>Comparison</b>                                                                     | <b>Sample Size</b> |
|------------------------------------|-------------|------------------|------------------------------------------------------------------------------------------------------------------------------------------------------------------|---------------------------------------------------------------------------------------|--------------------|
| <b>Shen J et al<sup>28</sup></b>   | 2007        | UFH + GPI vs UFH | Tirofiban 10 mcg/kg IV bolus, then 0.15 mcg/kg/min infusion for 36 hours + UFH 100 IU/kg IV bolus with additional boluses during PCI to achieve ACT of 150-350 s | UFH 100 IU/kg IV bolus with additional boluses during PCI to achieve ACT of 150-350 s | 160                |
| <b>Shen J et al<sup>29</sup></b>   | 2008        | UFH + GPI vs UFH | Tirofiban 10 mcg/kg IV bolus, then 0.15 mcg/kg/min infusion for 36 hours + UFH 100 IU/kg IV bolus with additional boluses during PCI to achieve ACT of 200-350 s | UFH 100 IU/kg IV bolus with additional boluses during PCI to achieve ACT of 200-350 s | 172                |
| <b>Zorman S et al<sup>30</sup></b> | 2002        | UFH + GPI vs UFH | Abciximab 0.25 mg/kg IV bolus, then 0.125 mcg/kg/min for 12 hours + UFH 70 IU/kg IV bolus in ER                                                                  | UFH 70 IU/kg IV bolus in ER                                                           | 163                |

ACE= Abciximab and Carbostent Evaluation; ACT=Activated clotting time; ADMIRAL= Abciximab before Direct Angioplasty and Stenting in Myocardial Infarction Regarding Acute and Long-Term Follow-up; ASSIST=A Safety and Efficacy Study of Integridin-Facilitated PCI Versus Primary PCI in ST-Elevation Myocardial Infarction; ATOLL=Acute Myocardial Infarction Treated with Primary Angioplasty and Intravenous Enoxaparin or Unfractionated Heparin to Lower Ischemic and Bleeding Events at Short- and Long-term Follow-up; BRAVE=Bavarian Reperfusion Alternatives Evaluation; BRIGHT=Bivalirudin versus Heparin Monotherapy and Glycoprotein IIb/IIIa Plus Heparin for Patients with AMI Undergoing Coronary Stenting; CADILLAC=Controlled Abciximab And Device Investigation To Lower Late Angioplasty Complications; DEBATER=Comparison of Drug Eluting and Bare Metal Stents With or Without Abciximab in ST Elevation Myocardial Infarction; EUROMAX=European Ambulance Acute Coronary Syndrome Angiography; GPI=Glycoprotein IIb/IIIa inhibitors; HEAT-PPCI=How Effective are Antithrombotic Therapies in PPCI; HORIZONS-AMI=Harmonizing Outcomes with Revascularization and Stents in Acute Myocardial Infarction; ISAR=Intracoronary Stenting and Antithrombotic Regimen; ITTI=Initial Thrombosuction and Tirofiban Infusion; LMWH=Low-molecular-weight heparin; OASIS= Organization for the Assessment of Strategies for Ischemic Syndromes; On-TIME=Ongoing Tirofiban In Myocardial infarction Evaluation; RAPPORT=ReoPro and Primary PTCA Organization and Randomized Trial; UFH=Unfractionated heparin

**Supplementary table D.** Baseline characteristics of included trials

| <b>Trial</b>                  | <b>Access Site</b> | <b>Thienopyridine</b>      | <b>Bleeding Definition</b> | <b>MACE Definition</b>                | <b>MI Definition</b>                                                                                                                                                                                                                                                                                                                                                                                 | <b>ST Definition</b> | <b>Quality of Trial*</b> |
|-------------------------------|--------------------|----------------------------|----------------------------|---------------------------------------|------------------------------------------------------------------------------------------------------------------------------------------------------------------------------------------------------------------------------------------------------------------------------------------------------------------------------------------------------------------------------------------------------|----------------------|--------------------------|
| <b>ACE</b> <sup>1,2</sup>     | NR                 | Clopidogrel or Ticlopidine | Blood transfusion          | Death, MI, TVR and Stroke             | Chest pain with ST-segment or T-wave changes and elevation of cardiac enzymes                                                                                                                                                                                                                                                                                                                        | NR                   | ++-                      |
| <b>ADMIRAL</b> <sup>3,4</sup> | Femoral            | Ticlopidine                | TIMI                       | Death, MI, TVR                        | Clinical symptoms and new electrocardiographic changes with a new elevation of the creatine kinase or creatine kinase MB isoenzyme levels                                                                                                                                                                                                                                                            | NR                   | +±-                      |
| <b>ASSIST</b> <sup>5</sup>    | Femoral (87%)      | Clopidogrel                | TIMI                       | Death, MI, recurrent severe ischemia  | Ischemic symptoms at rest, lasting at least 30 minutes and accompanied by any one of the following: (1) new or recurrent ST-segment elevation of equal or >1 mm (0.1 mV) in any contiguous leads, (2) new left bundle branch block, or (3) elevation in serum creatine kinase level more than twice the upper limit of normal and at least more than 50% of the lowest level measured postinfarction | NR                   | ++-                      |
| <b>ATOLL</b> <sup>6</sup>     | Radial (67%)       | Clopidogrel                | TIMI                       | Death, MI, Emergent revascularization | NR                                                                                                                                                                                                                                                                                                                                                                                                   | ARC                  | +++                      |

| <b>Trial</b>                  | <b>Access Site</b> | <b>Thienopyridine</b>    | <b>Bleeding Definition</b> | <b>MACE Definition</b>                   | <b>MI Definition</b>                                                                                                                                                                                                                                                                                                                                                                                                                                                                                                                                                                                                                                                                                                                                                                                                                                                                                                              | <b>ST Definition</b> | <b>Quality of Trial*</b> |
|-------------------------------|--------------------|--------------------------|----------------------------|------------------------------------------|-----------------------------------------------------------------------------------------------------------------------------------------------------------------------------------------------------------------------------------------------------------------------------------------------------------------------------------------------------------------------------------------------------------------------------------------------------------------------------------------------------------------------------------------------------------------------------------------------------------------------------------------------------------------------------------------------------------------------------------------------------------------------------------------------------------------------------------------------------------------------------------------------------------------------------------|----------------------|--------------------------|
| <b>BRAVE-3<sup>7,8</sup></b>  | NR                 | Clopidogrel              | TIMI                       | Death, MI, TVR, Stroke                   | If the biomarkers of the index MI were still increasing or the peak had not been reached, the patients had to have both new ECG changes consistent with MI (new or re-elevation of ST segments $\geq 0.2$ mV in $\geq 2$ contiguous precordial leads, $\geq 0.1$ mV in $\geq 2$ adjacent limb ECG leads, or development of new, abnormal Q waves considered distinct from the evolution of the index MI) and recurrent ischemic discomfort lasting $>20$ minutes at rest or ischemia triggered hemodynamic instability; if the biomarkers of the index MI were falling but still above the upper limit of normal, the patients had to have either an increase in creatine kinase-MB $\geq 50\%$ over the nadir level or new ECG changes consistent with MI (see above); if the biomarkers of the index MI were normalized, the patients had to have a new increase in creatine kinase-MB $\geq 3$ times the upper limit of normal | NR                   | +++                      |
| <b>BRAVE-4<sup>9,31</sup></b> | NR                 | Clopidogrel or Prasugrel | TIMI                       | Death, MI, TVR, Stent thrombosis, Stroke | TIMI                                                                                                                                                                                                                                                                                                                                                                                                                                                                                                                                                                                                                                                                                                                                                                                                                                                                                                                              | ARC                  | +++                      |
| <b>BRIGHT<sup>11</sup></b>    | Radial (79%)       | Clopidogrel              | BARC 3 or 5                | Death, MI, TVR, Stroke                   | NR                                                                                                                                                                                                                                                                                                                                                                                                                                                                                                                                                                                                                                                                                                                                                                                                                                                                                                                                | NR                   | +±±                      |



| <b>Trial</b>                                      | <b>Access Site</b> | <b>Thienopyridine</b>                | <b>Bleeding Definition</b> | <b>MACE Definition</b>                       | <b>MI Definition</b>                                                                                                                                                                                                                                                                                                                                                          | <b>ST Definition</b> | <b>Quality of Trial*</b> |
|---------------------------------------------------|--------------------|--------------------------------------|----------------------------|----------------------------------------------|-------------------------------------------------------------------------------------------------------------------------------------------------------------------------------------------------------------------------------------------------------------------------------------------------------------------------------------------------------------------------------|----------------------|--------------------------|
| <b>CADILLAC (STEMI subgroup)</b> <sup>12,13</sup> | NR                 | Clopidogrel or Ticlopidine           | NR                         | Death, MI, TVR, Stroke                       | Ischemic symptoms or electrocardiographic changes accompanied by a creatine kinase level that was more than twice the upper limit of the normal range (with an elevated MB isoform level) or more than 50 percent higher than the previous value obtained during hospitalization                                                                                              | NR                   | ++±                      |
| <b>DEBATER</b> <sup>14</sup>                      | NR                 | Clopidogrel                          | NR                         | Death, MI, Revascularization, Stroke         | New episode of chest pain followed by creatine kinase or troponin concentrations exceeding twice the upper limit of normal or new Q waves on the electrocardiogram. Recurrent MI during the first 48 h was diagnosed when there was a decrease from a previous peak value of enzyme level followed by a subsequent rise to a level exceeding twice the upper limit of normal. | ARC                  | ++±                      |
| <b>EUROMAX</b> <sup>15</sup>                      | Femoral (53%)      | Clopidogrel, Prasugrel or Ticagrelor | TIMI                       | Death, MI, Revascularization, Stroke         |                                                                                                                                                                                                                                                                                                                                                                               | ARC                  | +++                      |
| <b>Fu XH et al</b> <sup>16</sup>                  | Radial             | Clopidogrel                          | TIMI                       | Death, MI, Serious heart failure, arrhythmia | NR                                                                                                                                                                                                                                                                                                                                                                            | NR                   | ±±-                      |

| <b>Trial</b>                           | <b>Access Site</b> | <b>Thienopyridine</b>                | <b>Bleeding Definition</b> | <b>MACE Definition</b> | <b>MI Definition</b>                                                                                                                                                                                                                                                                                                                                                                                                                                                                                                                       | <b>ST Definition</b> | <b>Quality of Trial*</b> |
|----------------------------------------|--------------------|--------------------------------------|----------------------------|------------------------|--------------------------------------------------------------------------------------------------------------------------------------------------------------------------------------------------------------------------------------------------------------------------------------------------------------------------------------------------------------------------------------------------------------------------------------------------------------------------------------------------------------------------------------------|----------------------|--------------------------|
| <b>HEAT-PPCI</b> <sup>17</sup>         | Radial (81%)       | Clopidogrel, Prasugrel or Ticagrelor | BARC 3 or 5                | Death, MI, TLR, Stroke | Detection of rise of cardiac enzymes (Troponin or CK-MB) with at least one value above the 99th percentile upper reference limit together with at least one of the following: 1) Symptoms of ischaemia; 2) ECG changes suggestive of new ischaemia (ST-T changes or new onset LBBB); 3) Development of new pathological Q waves, in at least 2 consecutive leads                                                                                                                                                                           | NR                   | +±±                      |
| <b>HORIZONS - AMI</b> <sup>18,19</sup> | Femoral (94%)      | Clopidogrel                          | TIMI                       | Death, MI, TVR, Stroke |                                                                                                                                                                                                                                                                                                                                                                                                                                                                                                                                            | ARC                  | ++-                      |
| <b>ISAR-2</b> <sup>20,21</sup>         | NR                 | Ticlopidine                          | Blood transfusion          | Death, MI, TLR         | During the initial hospitalization, the diagnosis was based on the presence of chest pain with either new ST-segment changes or an increase in creatine kinase (CK) and its MB isoenzyme of at least 50% over the previous trough level in at least 2 samples exceeding 3 times the upper limit of normal. After discharge, the diagnosis was based on the presence of typical chest pain accompanied by either the appearance of pathological Q-waves on electrocardiogram or an increase of CK/CK-MB >2 times the upper limit of normal. | NR                   | ++-                      |
| <b>ITTI</b> <sup>22</sup>              | NR                 | Clopidogrel                          | TIMI                       | Death, MI, TLR, Stroke | NR                                                                                                                                                                                                                                                                                                                                                                                                                                                                                                                                         | NR                   | +±±                      |
| <b>Li WM et al</b> <sup>23</sup>       | NR                 | Clopidogrel                          | TIMI                       | Death, MI, TVR         | NR                                                                                                                                                                                                                                                                                                                                                                                                                                                                                                                                         | NR                   | +±-                      |

| <b>Trial</b>                                     | <b>Access Site</b> | <b>Thienopyridine</b>      | <b>Bleeding Definition</b> | <b>MACE Definition</b> | <b>MI Definition</b>                                                                                                                                                                                                                                                                                                                                                                                                                                                                                                                                                                                                                                                                                                                                                                                                                                                                                                                                                                                                                                                                  | <b>ST Definition</b> | <b>Quality of Trial*</b> |
|--------------------------------------------------|--------------------|----------------------------|----------------------------|------------------------|---------------------------------------------------------------------------------------------------------------------------------------------------------------------------------------------------------------------------------------------------------------------------------------------------------------------------------------------------------------------------------------------------------------------------------------------------------------------------------------------------------------------------------------------------------------------------------------------------------------------------------------------------------------------------------------------------------------------------------------------------------------------------------------------------------------------------------------------------------------------------------------------------------------------------------------------------------------------------------------------------------------------------------------------------------------------------------------|----------------------|--------------------------|
| <b>Neumann FJ et al<sup>24</sup></b>             | NR                 | Ticlopidine                | NR                         | Death, MI, TLR         | Based on typical chest pain, new ST-segment changes and an increase in creatine kinase of at least 50% over the previous trough level in at least two samples reaching $\geq 240$ U/liter                                                                                                                                                                                                                                                                                                                                                                                                                                                                                                                                                                                                                                                                                                                                                                                                                                                                                             | NR                   | +++                      |
| <b>OASIS-6 (Primary PCI cohort)<sup>25</sup></b> | NR                 | Clopidogrel or Ticlopidine | Modified TIMI              | Death or MI            | (1) within 24 hours of randomization— recurrent ischemic symptoms with new persistent ST elevation greater than 1 mm in at least 2 contiguous leads or new persistent ST depression greater than 1 mm in at least 2 contiguous leads not due to changes from evolution of the index MI; (2) between 24 hours and 7 days of randomization— ischemic symptoms greater than 20 minutes and either creatine kinase-CK (CK-MB; or total CK if CK-MB not available) greater than twice the upper limit of normal or further elevations more than 50% above previous lowest level in patients with already elevated enzymes or new or recurrent STEMI or depression of more than 1 mm or new significant Q waves in at least 2 contiguous leads, which was separate from the baseline MI; (3) after 7 days of randomization—either typical rise and fall of biochemical markers of myocardial necrosis to greater than twice the upper limit of normal or if markers were already elevated, further elevation of a marker to greater than 50% of the lowest recovery level from the index MI | NR                   | +±±                      |

| Trial                               | Access Site | Thienopyridine           | Bleeding Definition | MACE Definition | MI Definition                                                                                                                                                                                                                                                                                                                                                                                                                                                                                                                                                                                                                                                                                                                                                                                                                                                              | ST Definition | Quality of Trial* |
|-------------------------------------|-------------|--------------------------|---------------------|-----------------|----------------------------------------------------------------------------------------------------------------------------------------------------------------------------------------------------------------------------------------------------------------------------------------------------------------------------------------------------------------------------------------------------------------------------------------------------------------------------------------------------------------------------------------------------------------------------------------------------------------------------------------------------------------------------------------------------------------------------------------------------------------------------------------------------------------------------------------------------------------------------|---------------|-------------------|
| <b>On-TIME 2</b> <sup>26,27</sup>   | NR          | Clopidogrel              | TIMI                | Death, MI, TVR  | with either ischemic symptoms, development of new pathological Q waves, or other ischemic changes on the electrocardiogram or coronary artery intervention. After PCI, a new MI was defined by CK-MB greater than 3 times the upper limit of normal (and this elevation was greater than 50% of the lowest recovery level)<br>Recurrent myocardial infarction was defined as a new increase of creatine kinase MB that was three or more times the upper limit of normal, present in two separate blood samples, and accompanied by chest pain or ECG changes. Early recurrent myocardial infarction was defined as a decrease in creatine kinase MB of at least 50% of the upper limit of normal from a previous peak concentration to a valley, followed by a new increase with a value above the sum of the preceding valley and three times the upper limit of normal. | NR            | +++               |
| <b>Shen J et al</b> <sup>28</sup>   | Femoral     | Clopidogrel or Prasugrel | TIMI                | Death, MI, TVR  | NR                                                                                                                                                                                                                                                                                                                                                                                                                                                                                                                                                                                                                                                                                                                                                                                                                                                                         | NR            | ++±               |
| <b>Shen J et al</b> <sup>29</sup>   | Femoral     | Clopidogrel              | TIMI                | Death, MI, TVR  | NR                                                                                                                                                                                                                                                                                                                                                                                                                                                                                                                                                                                                                                                                                                                                                                                                                                                                         | NR            | ++±               |
| <b>Zorman S et al</b> <sup>30</sup> | NR          | NR                       | NR                  | NR              | NR                                                                                                                                                                                                                                                                                                                                                                                                                                                                                                                                                                                                                                                                                                                                                                                                                                                                         | NR            | +±±               |

See foot note of Table 1 for expansion of trial names; ARC = Academic Research Consortium; MACE=Major adverse cardiac and/or cerebrovascular events; MI=Myocardial infarction; NR=Not reported; TLR=Target lesion revascularization; TVR=Target vessel revascularization

\*Represents risk of bias based on: sequence generation of allocation; allocation concealment and blinding. '+' represents low bias risk, '-' high bias risk and '±' unclear bias risk.

## References

1. Antoniucci D, Migliorini A, Parodi G, et al. Abciximab-supported infarct artery stent implantation for acute myocardial infarction and long-term survival: a prospective, multicenter, randomized trial comparing infarct artery stenting plus abciximab with stenting alone. *Circulation*. Apr 13 2004;109(14):1704-1706.
2. Antoniucci D, Rodriguez A, Hempel A, et al. A randomized trial comparing primary infarct artery stenting with or without abciximab in acute myocardial infarction. *J Am Coll Cardiol*. Dec 3 2003;42(11):1879-1885.
3. Admiral I. Three-year duration of benefit from abciximab in patients receiving stents for acute myocardial infarction in the randomized double-blind ADMIRAL study. *Eur Heart J*. Dec 2005;26(23):2520-2523.
4. Montalescot G, Barragan P, Wittenberg O, et al. Platelet glycoprotein IIb/IIIa inhibition with coronary stenting for acute myocardial infarction. *N Engl J Med*. Jun 21 2001;344(25):1895-1903.
5. Le May MR, Wells GA, Glover CA, et al. Primary percutaneous coronary angioplasty with and without eptifibatide in ST-segment elevation myocardial infarction: a safety and efficacy study of integrilin-facilitated versus primary percutaneous coronary intervention in ST-segment elevation myocardial infarction (ASSIST). *Circ Cardiovasc Interv*. Aug 2009;2(4):330-338.
6. Montalescot G, Zeymer U, Silvain J, et al. Intravenous enoxaparin or unfractionated heparin in primary percutaneous coronary intervention for ST-elevation myocardial infarction: the international randomised open-label ATOLL trial. *Lancet*. Aug 20 2011;378(9792):693-703.
7. Mehilli J, Kastrati A, Schulz S, et al. Abciximab in patients with acute ST-segment-elevation myocardial infarction undergoing primary percutaneous coronary intervention after clopidogrel loading: a randomized double-blind trial. *Circulation*. Apr 14 2009;119(14):1933-1940.
8. Schulz S, Birkmeier KA, Ndrepepa G, et al. One-year clinical outcomes with abciximab in acute myocardial infarction: results of the BRAVE-3 randomized trial. *Clin Res Cardiol*. Dec 2010;99(12):795-802.
9. Schulz S, Richardt G, Laugwitz KL, et al. Comparison of Prasugrel and Bivalirudin vs Clopidogrel and Heparin in Patients With ST-Segment Elevation Myocardial Infarction: Design and Rationale of the Bavarian Reperfusion Alternatives Evaluation (BRAVE) 4 Trial. *Clin Cardiol*. Mar 14 2014.
10. Schulz S, Richardt G, Laugwitz KL, et al. Prasugrel plus bivalirudin vs. clopidogrel plus heparin in patients with ST-segment elevation myocardial infarction. *Eur Heart J*. May 9 2014.
11. Han YL, Wang XZ, Jing QM, Wang SL, Ma YY, Luan B. [Comparison of Rapamycin and Paclitaxel eluting stent in patients with multi-vessel coronary disease]. *Zhonghua Xin Xue Guan Bing Za Zhi*. Feb 2006;34(2):123-126.
12. Cox DA, Stone GW, Grines CL, et al. Comparative early and late outcomes after primary percutaneous coronary intervention in ST-segment elevation and non-ST-segment elevation acute myocardial infarction (from the CADILLAC trial). *Am J Cardiol*. Aug 1 2006;98(3):331-337.
13. Stone GW, Grines CL, Cox DA, et al. Comparison of angioplasty with stenting, with or without abciximab, in acute myocardial infarction. *N Engl J Med*. Mar 28 2002;346(13):957-966.
14. Wijnbergen I, Helmes H, Tijssen J, et al. Comparison of drug-eluting and bare-metal stents for primary percutaneous coronary intervention with or without abciximab in ST-segment elevation myocardial infarction: DEBATER: the Eindhoven reperfusion study. *JACC Cardiovasc Interv*. Mar 2012;5(3):313-322.
15. Steg PG, van 't Hof A, Hamm CW, et al. Bivalirudin started during emergency transport for primary PCI. *N Engl J Med*. Dec 5 2013;369(23):2207-2217.
16. Fu XH, Hao QQ, Jia XW, et al. Effect of tirofiban plus clopidogrel and aspirin on primary percutaneous coronary intervention via transradial approach in patients with acute myocardial infarction. *Chin Med J (Engl)*. Mar 20 2008;121(6):522-527.

17. Shahzad A. HEAT PPCI - How Effective are Antithrombotic Therapies in PPCI. Paper presented at: ACC'14; March 2014.
18. Stone GW, Witzenbichler B, Guagliumi G, et al. Heparin plus a glycoprotein IIb/IIIa inhibitor versus bivalirudin monotherapy and paclitaxel-eluting stents versus bare-metal stents in acute myocardial infarction (HORIZONS-AMI): final 3-year results from a multicentre, randomised controlled trial. *Lancet*. Jun 25 2011;377(9784):2193-2204.
19. Stone GW, Witzenbichler B, Guagliumi G, et al. Bivalirudin during primary PCI in acute myocardial infarction. *N Engl J Med*. May 22 2008;358(21):2218-2230.
20. Ndrepepa G, Kastrati A, Neumann FJ, Schmitt C, Mehilli J, Schomig A. Five-year outcome of patients with acute myocardial infarction enrolled in a randomised trial assessing the value of abciximab during coronary artery stenting. *Eur Heart J*. Sep 2004;25(18):1635-1640.
21. Neumann FJ, Kastrati A, Schmitt C, et al. Effect of glycoprotein IIb/IIIa receptor blockade with abciximab on clinical and angiographic restenosis rate after the placement of coronary stents following acute myocardial infarction. *J Am Coll Cardiol*. Mar 15 2000;35(4):915-921.
22. Liu CP, Lin MS, Chiu YW, et al. Additive benefit of glycoprotein IIb/IIIa inhibition and adjunctive thrombus aspiration during primary coronary intervention: results of the Initial Thrombosuction and Tirofiban Infusion (ITTI) trial. *Int J Cardiol*. Apr 19 2012;156(2):174-179.
23. Li WM, Yang XC, Wang LF, et al. Comparison of tirofiban combined with dalteparin or unfractionated heparin in primary percutaneous coronary intervention of acute ST-segment elevation myocardial infarction patients. *Chin Med J (Engl)*. Oct 2011;124(20):3275-3280.
24. Neumann FJ, Blasini R, Schmitt C, et al. Effect of glycoprotein IIb/IIIa receptor blockade on recovery of coronary flow and left ventricular function after the placement of coronary-artery stents in acute myocardial infarction. *Circulation*. Dec 15 1998;98(24):2695-2701.
25. Yusuf S, Mehta SR, Chrolavicius S, et al. Effects of fondaparinux on mortality and reinfarction in patients with acute ST-segment elevation myocardial infarction: the OASIS-6 randomized trial. *JAMA*. Apr 5 2006;295(13):1519-1530.
26. ten Berg JM, van 't Hof AW, Dill T, et al. Effect of early, pre-hospital initiation of high bolus dose tirofiban in patients with ST-segment elevation myocardial infarction on short- and long-term clinical outcome. *J Am Coll Cardiol*. Jun 1 2010;55(22):2446-2455.
27. Van't Hof AW, Ten Berg J, Heestermans T, et al. Prehospital initiation of tirofiban in patients with ST-elevation myocardial infarction undergoing primary angioplasty (On-TIME 2): a multicentre, double-blind, randomised controlled trial. *Lancet*. Aug 16 2008;372(9638):537-546.
28. Shen J, Zhang Q, Zhang RY. [Clinical outcomes and safety of primary percutaneous coronary intervention combined with tirofiban therapy in patients with acute ST-segment elevation myocardial infarction]. *Zhonghua Xin Xue Guan Bing Za Zhi*. Nov 2007;35(11):1005-1009.
29. Shen J, Zhang Q, Zhang RY, et al. Clinical benefits of adjunctive tirofiban therapy in patients with acute ST-segment elevation myocardial infarction undergoing primary percutaneous coronary intervention. *Coron Artery Dis*. Jun 2008;19(4):271-277.
30. Zorman S, Zorman D, Noc M. Effects of abciximab pretreatment in patients with acute myocardial infarction undergoing primary angioplasty. *Am J Cardiol*. Sep 1 2002;90(5):533-536.
31. Richardt G. Randomized Comparison of Prasugrel and Bivalirudin versus Clopidogrel and Heparin in Patients with ST-Segment Elevation Myocardial Infarction - The Bavarian Reperfusion Alternatives Evaluation (BRAVE) 4 Trial. Paper presented at: ACC'14; March 2014.

**Supplementary figure 1. Study Selection**

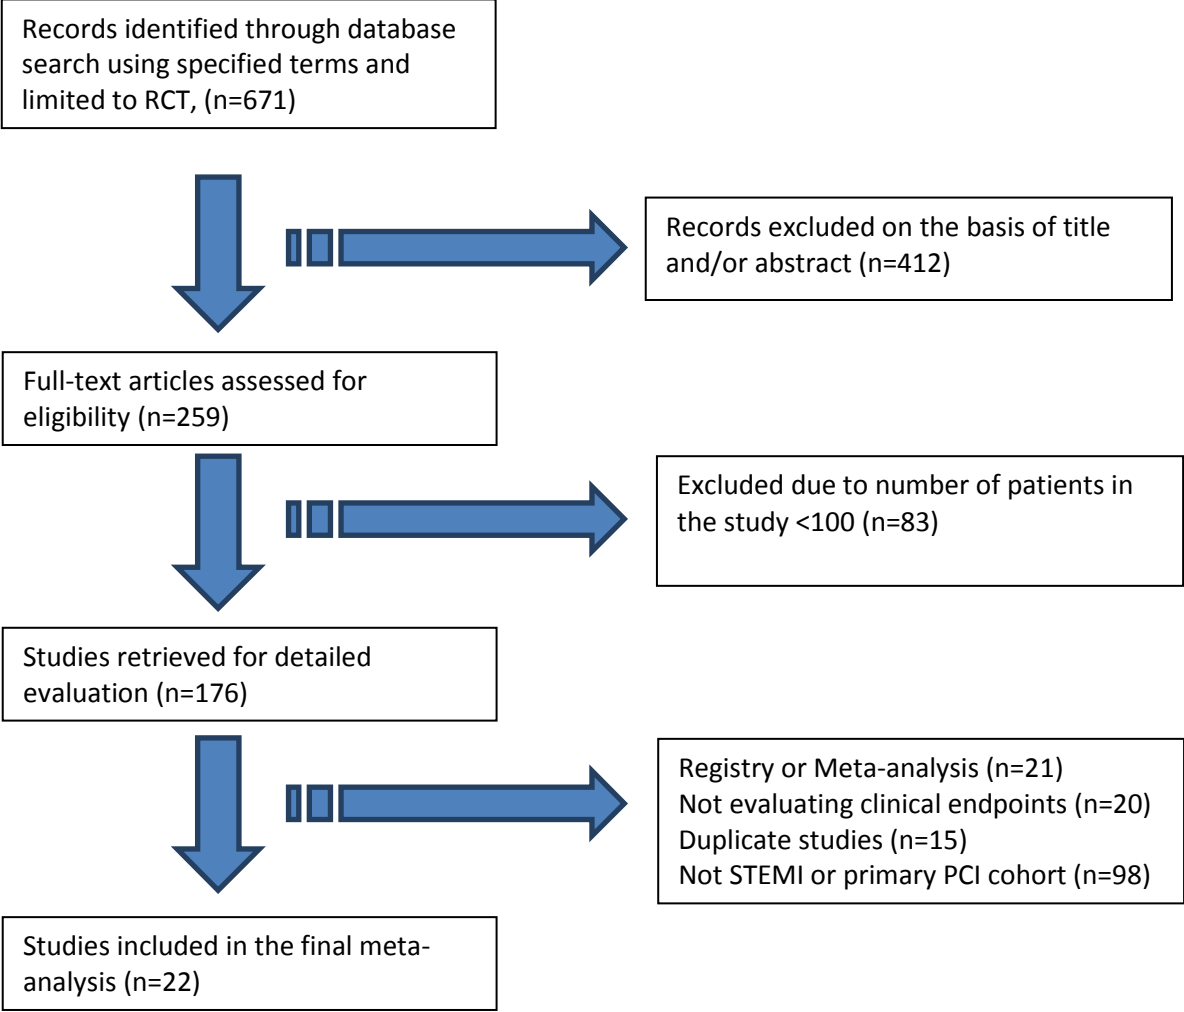

**Supplementary figure 2a.** Rankogram for the outcome of MACCE. Plot presents the ranking probabilities and their uncertainty.

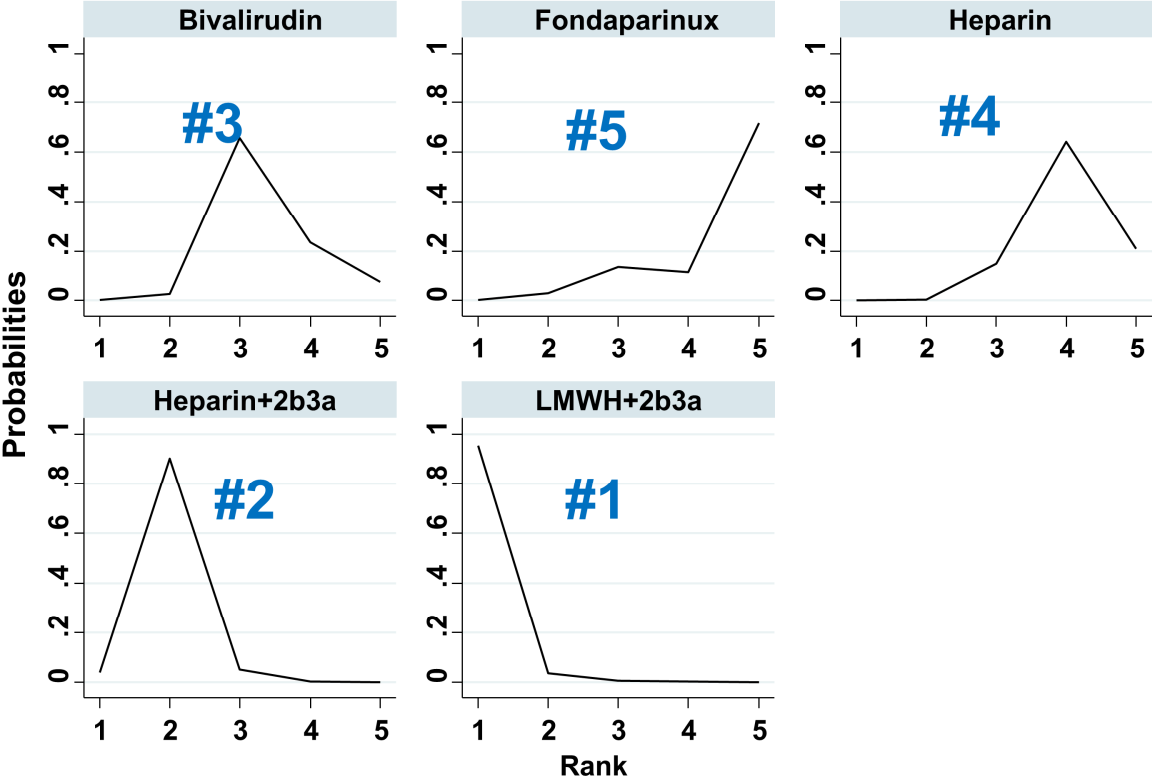



**Supplementary figure 2b.** Hierarchy of treatments for the outcome of MACCE using surface under cumulative ranking curves (SUCRA). The higher the SUCRA value higher is the treatment rank.

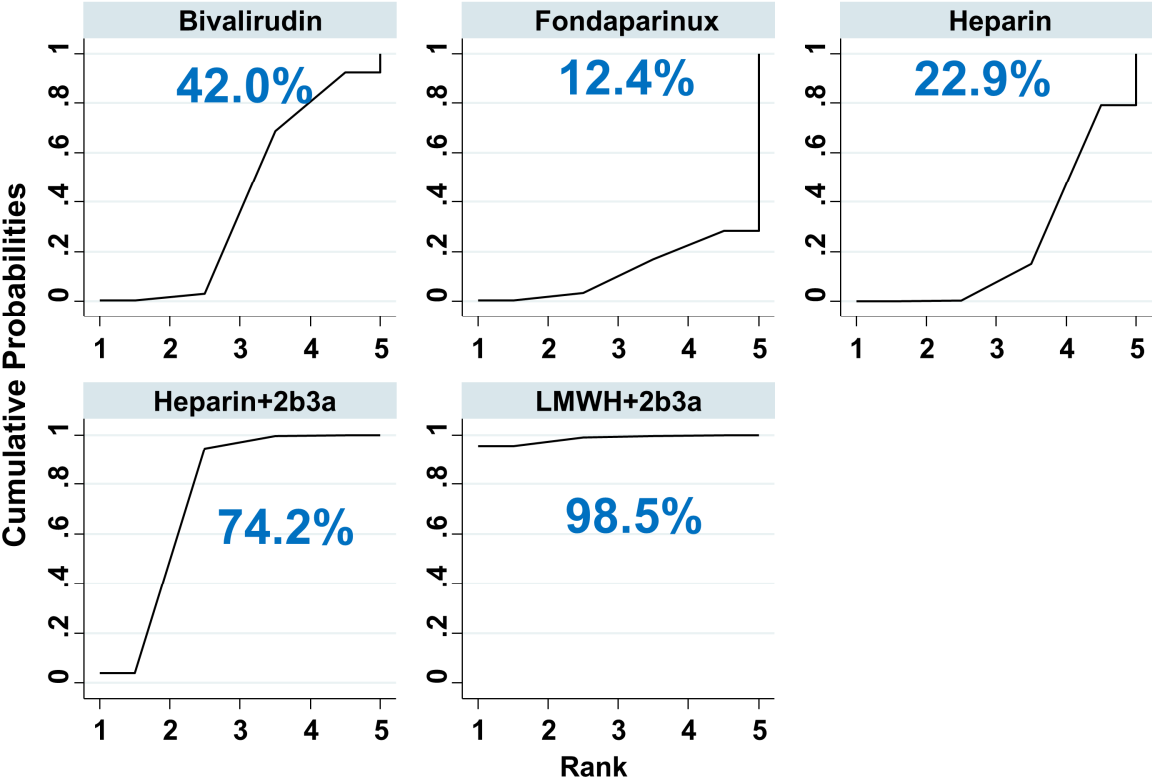

**Supplementary figure 3a.** Rankogram for the outcome of death. Plot presents the ranking probabilities and their uncertainty.

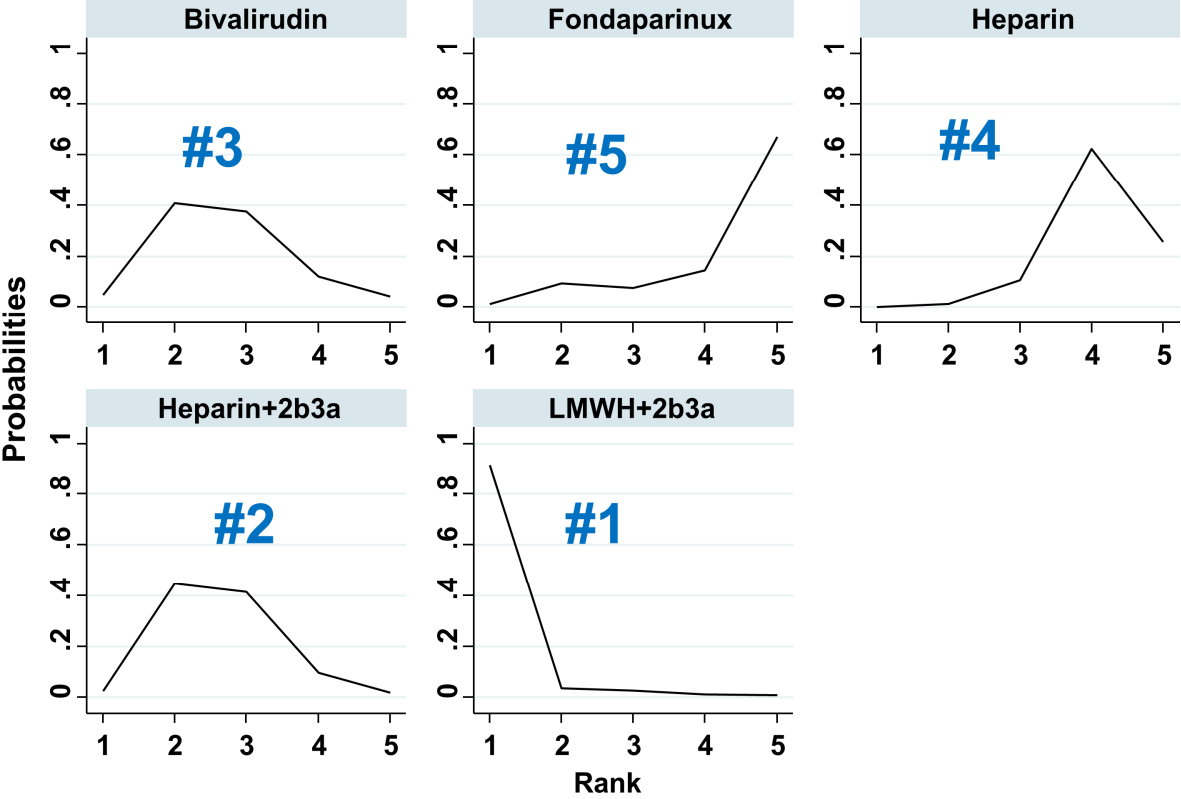

**Supplementary figure 3b.** Hierarchy of treatments for the outcome of death using surface under cumulative ranking curves (SUCRA). The higher the SUCRA value higher is the treatment rank.

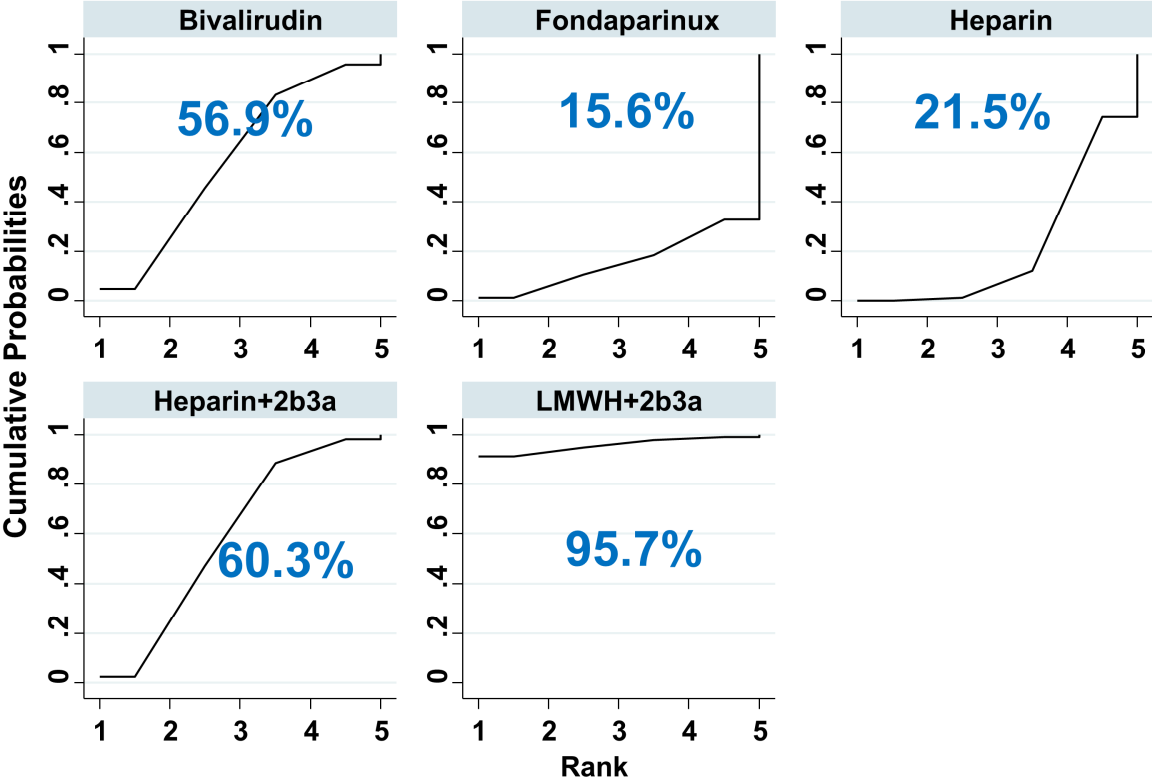

**Supplementary figure 4a.** Rankogram for the outcome of myocardial infarction. Plot presents the ranking probabilities and their uncertainty.

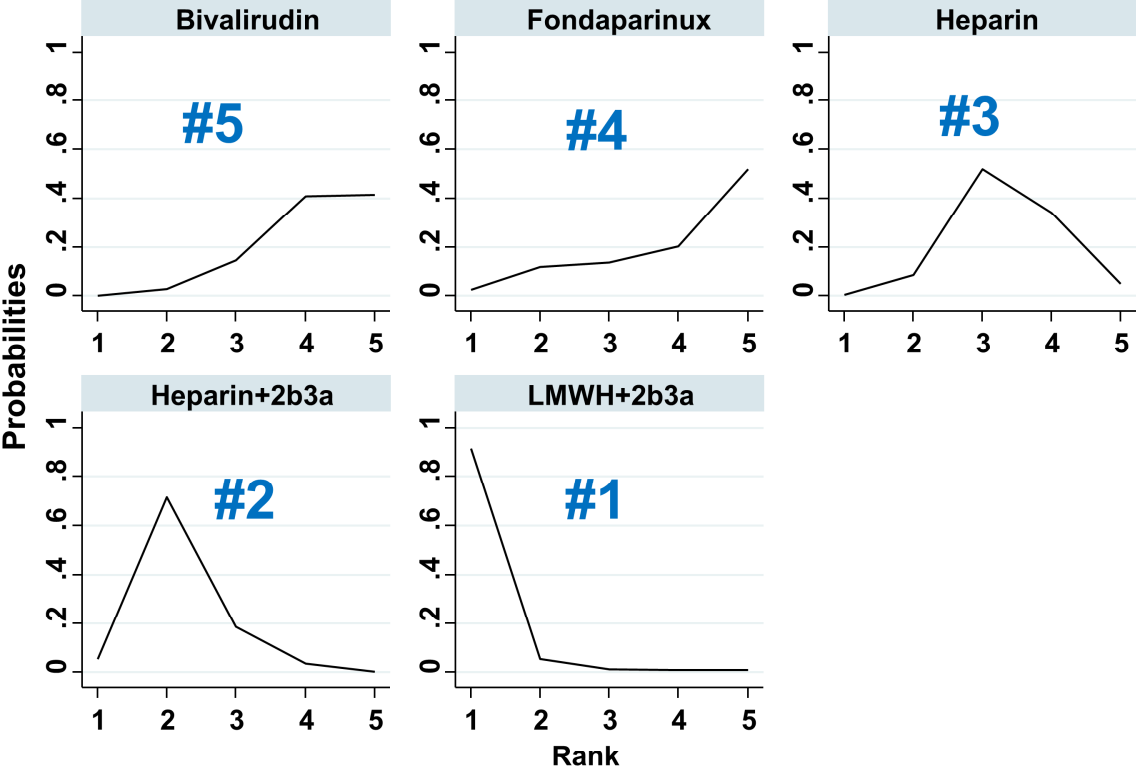

**Supplementary figure 4b.** Hierarchy of treatments for the outcome of myocardial infarction using surface under cumulative ranking curves (SUCRA). The higher the SUCRA value higher is the treatment rank.

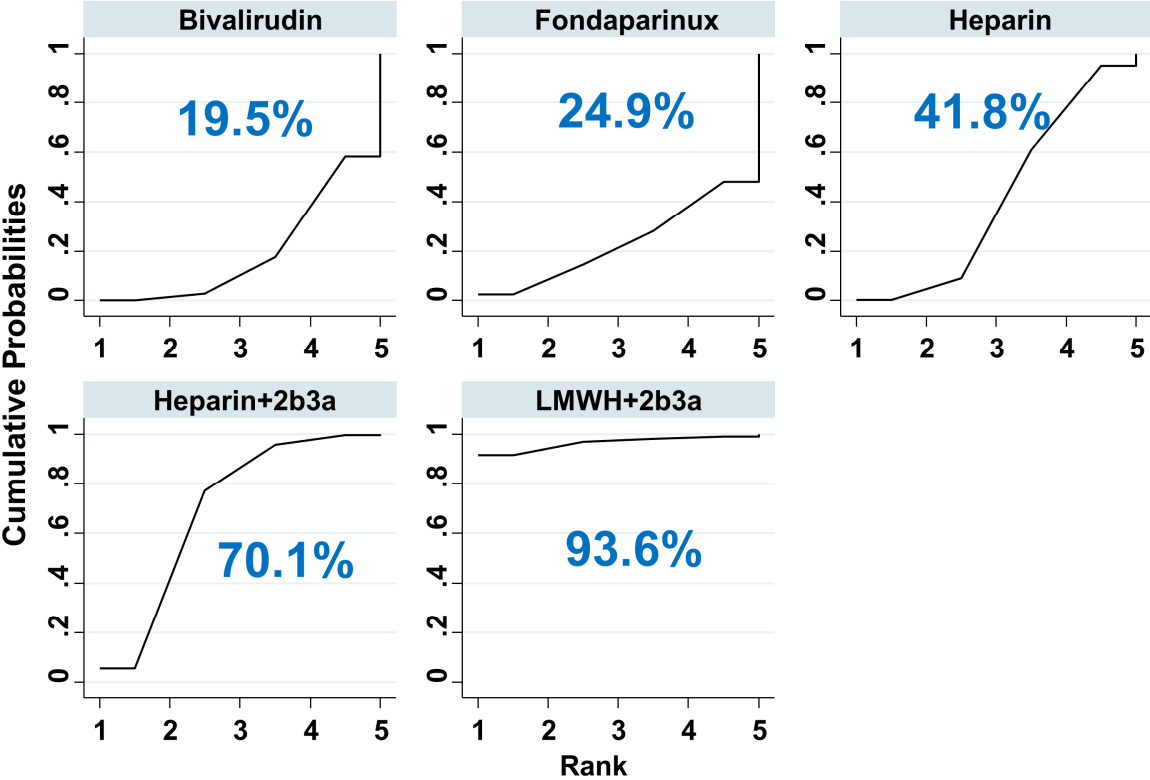

**Supplementary figure 5a.** Rankogram for the outcome of urgent revascularization. Plot presents the ranking probabilities and their uncertainty.

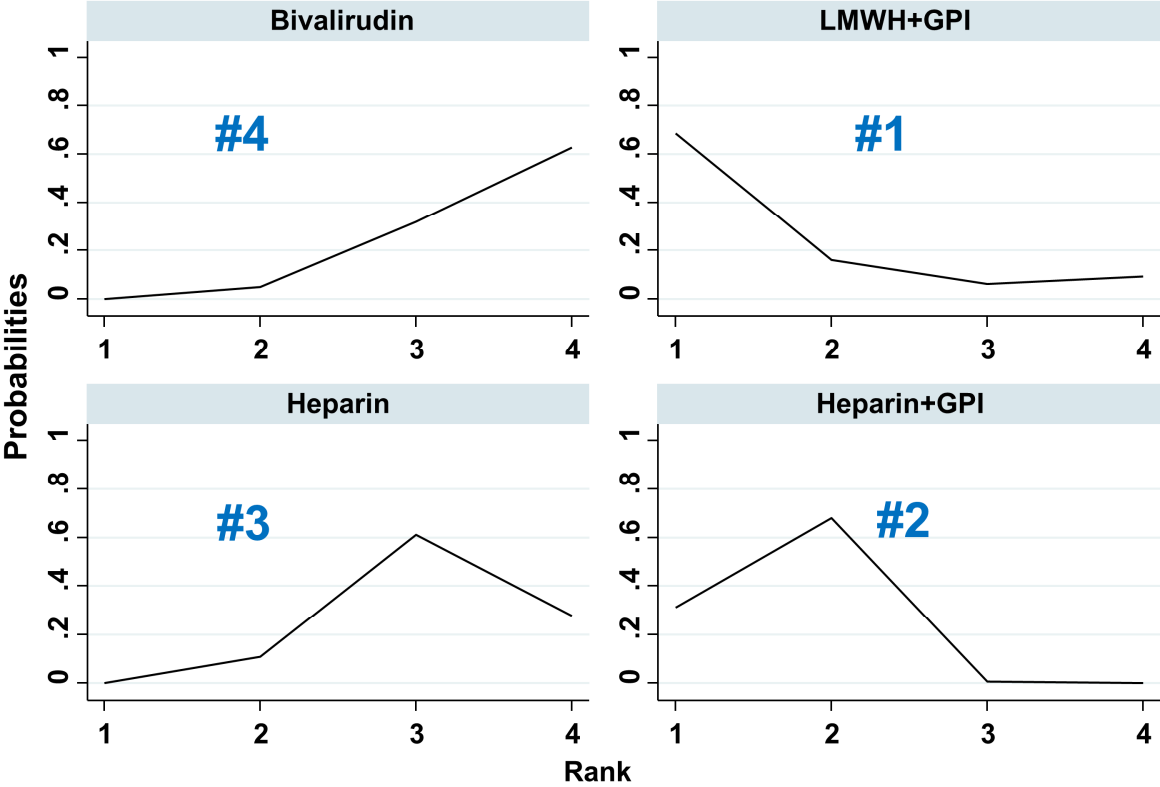

**Supplementary figure 5b.** Hierarchy of treatments for the outcome of urgent revascularization using surface under cumulative ranking curves (SUCRA). The higher the SUCRA value higher is the treatment rank.

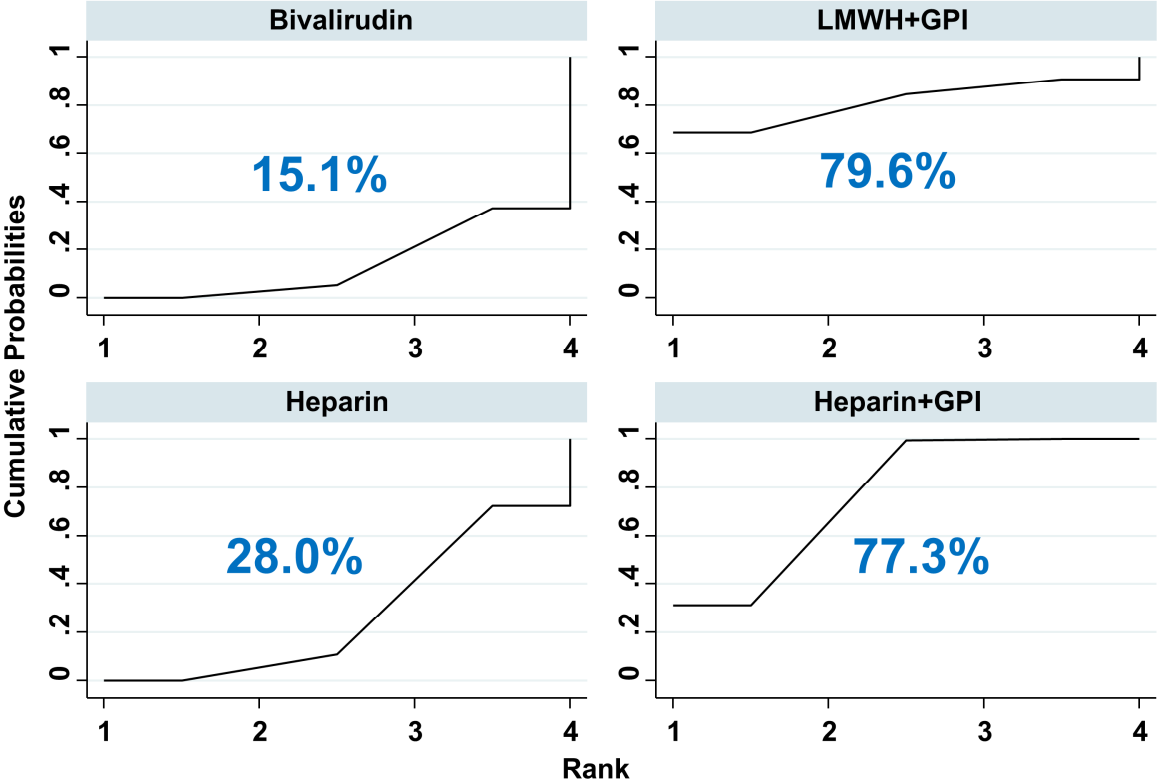

**Supplementary figure 6a.** Rankogram for the outcome of stent thrombosis. Plot presents the ranking probabilities and their uncertainty.

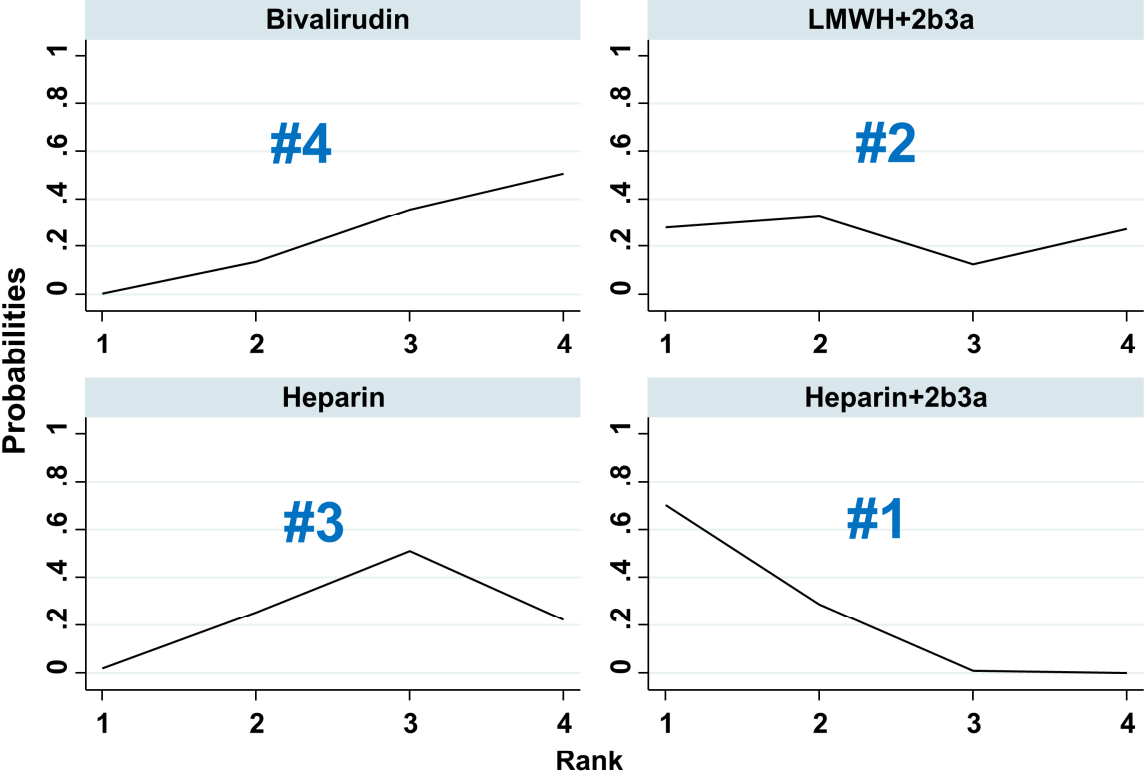



**Supplementary figure 6b.** Hierarchy of treatments for the outcome of stent thrombosis using surface under cumulative ranking curves (SUCRA). The higher the SUCRA value higher is the treatment rank.

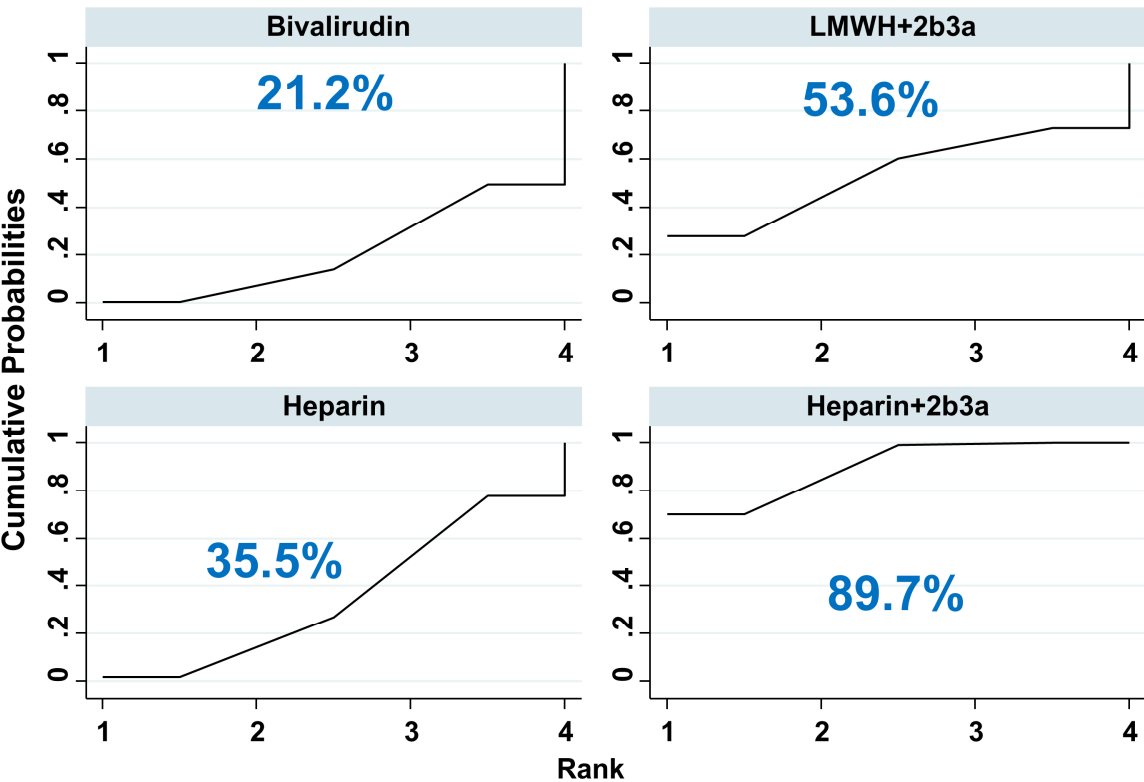

**Supplementary figure 7a.** Rankogram for the outcome of major bleeding. Plot presents the ranking probabilities and their uncertainty.

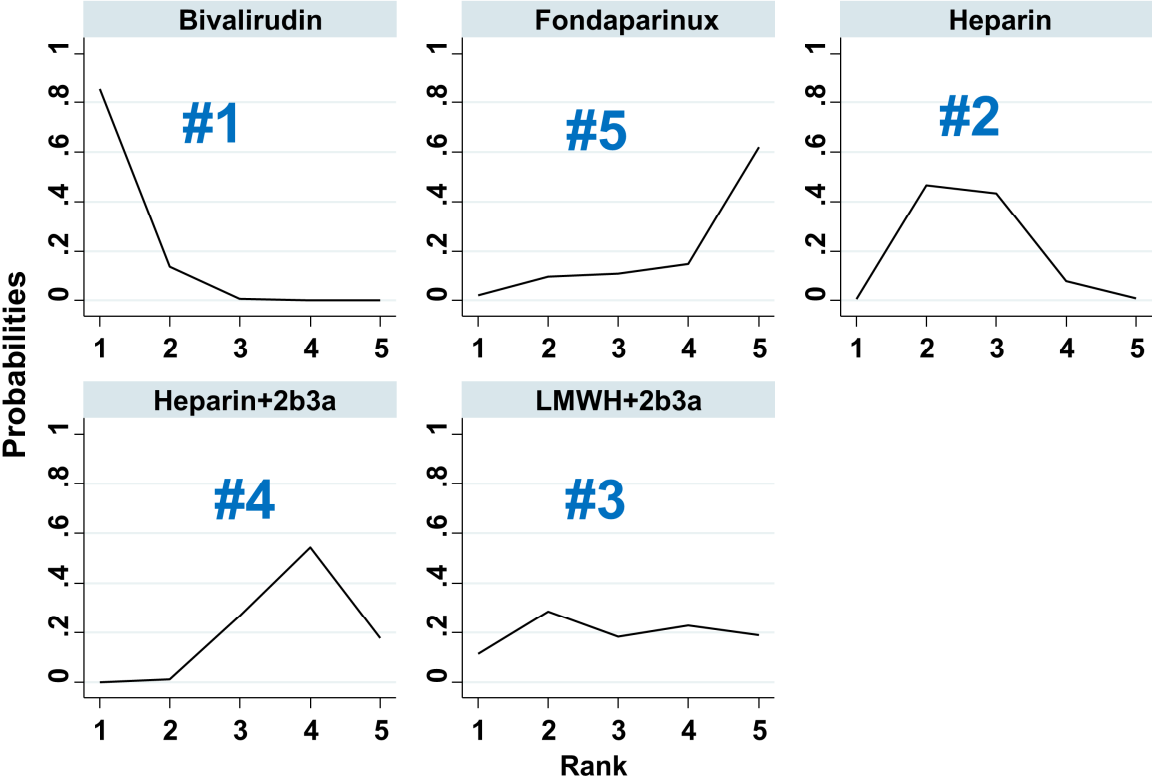

**Supplementary figure 7b.** Hierarchy of treatments for the outcome of major bleeding using surface under cumulative ranking curves (SUCRA). The higher the SUCRA value higher is the treatment rank.

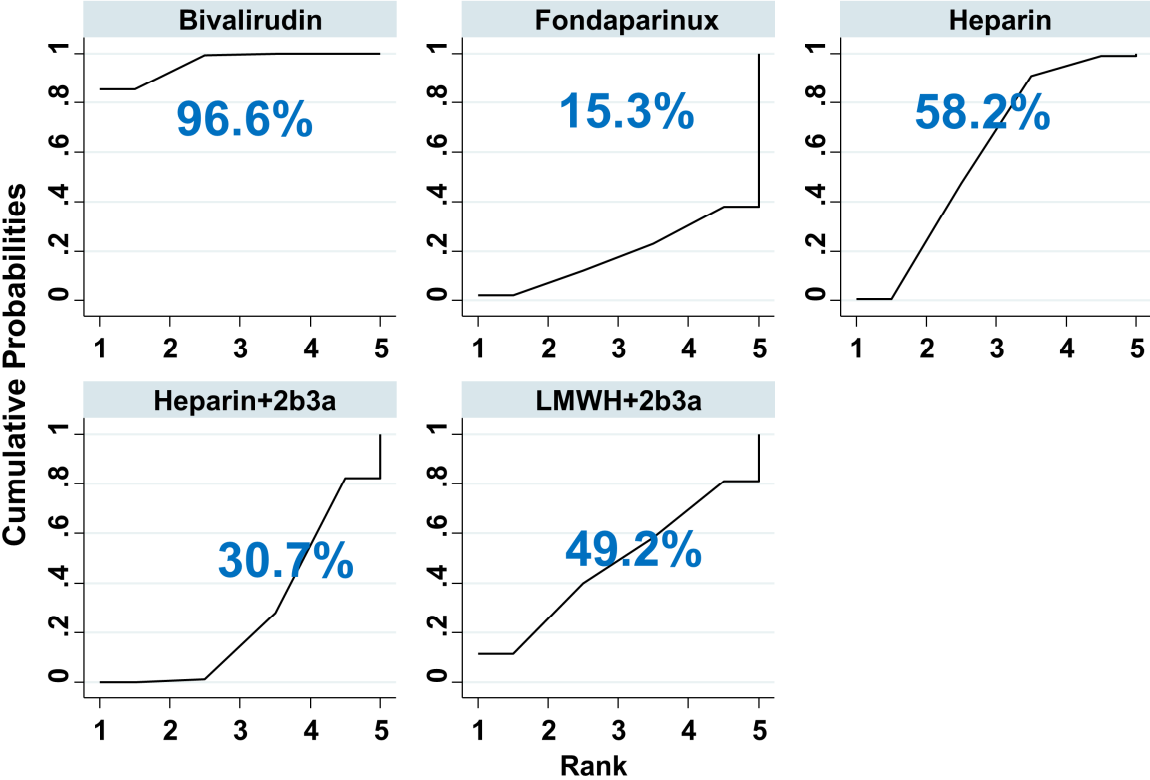

**Supplementary figure 8a.** Rankogram for the outcome of minor bleeding. Plot presents the ranking probabilities and their uncertainty.

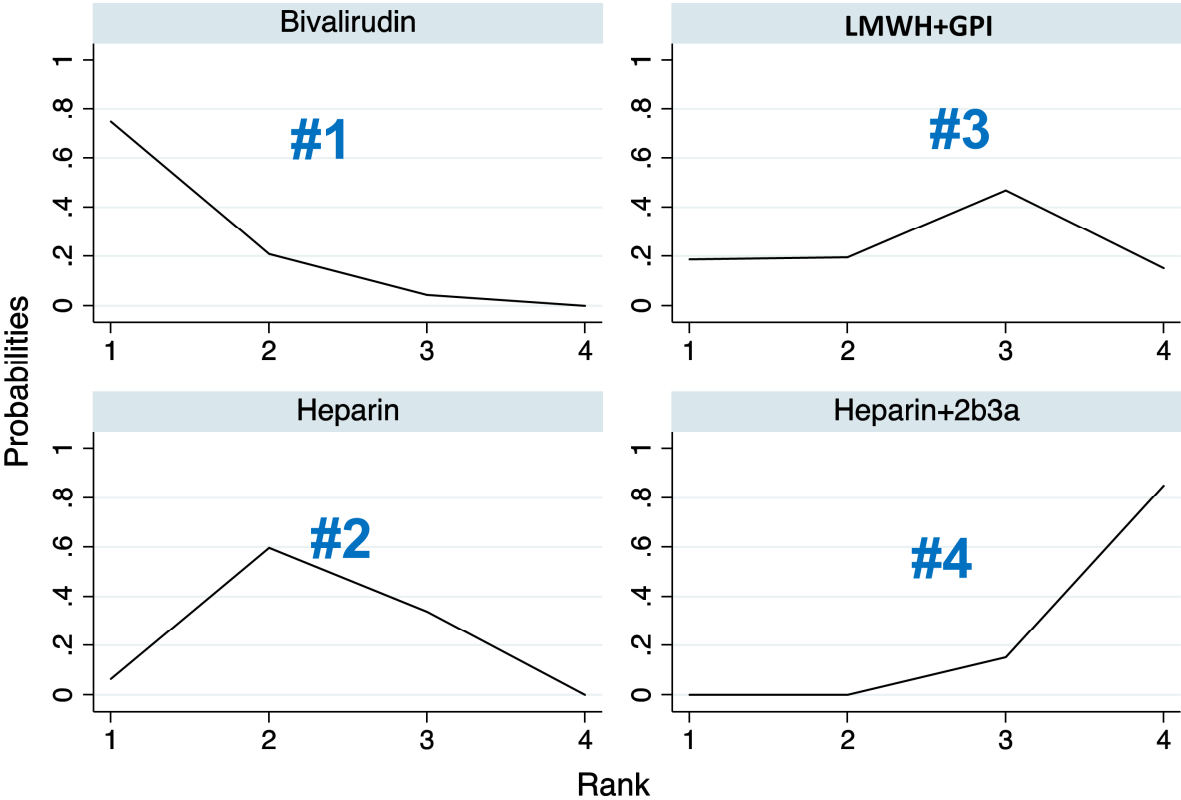

**Supplementary figure 8b.** Hierarchy of treatments for the outcome of minor bleeding using surface under cumulative ranking curves (SUCRA). The higher the SUCRA value higher is the treatment rank.

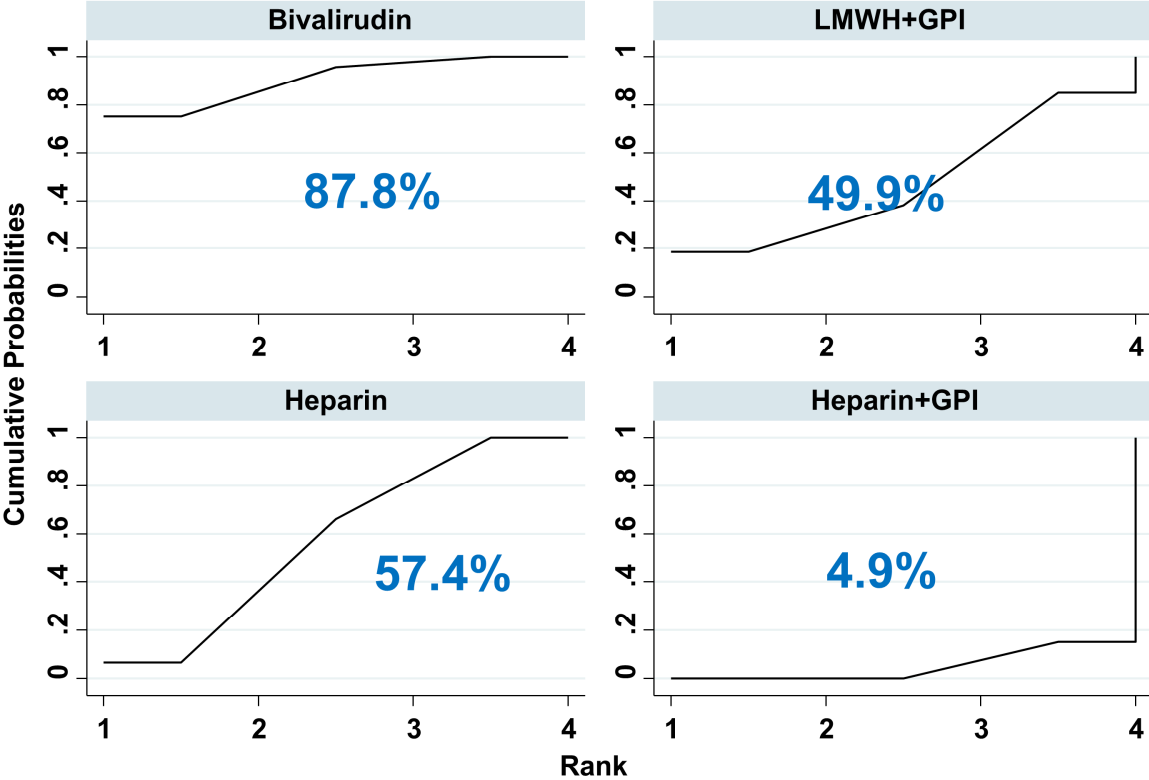

**Supplementary figure 9a.** Comparison adjusted funnel plot for the outcome of MACE. A= UFH+GPI; B=UFH; C=Bivalirudin; D=Fondaparinux; E=LMWH+GPI. The horizontal axis is the study-specific effect sizes centered to the respective comparison-specific pooled effect size while the vertical axis is the inverted standard error of the effect sizes as used in a standard funnel plot.

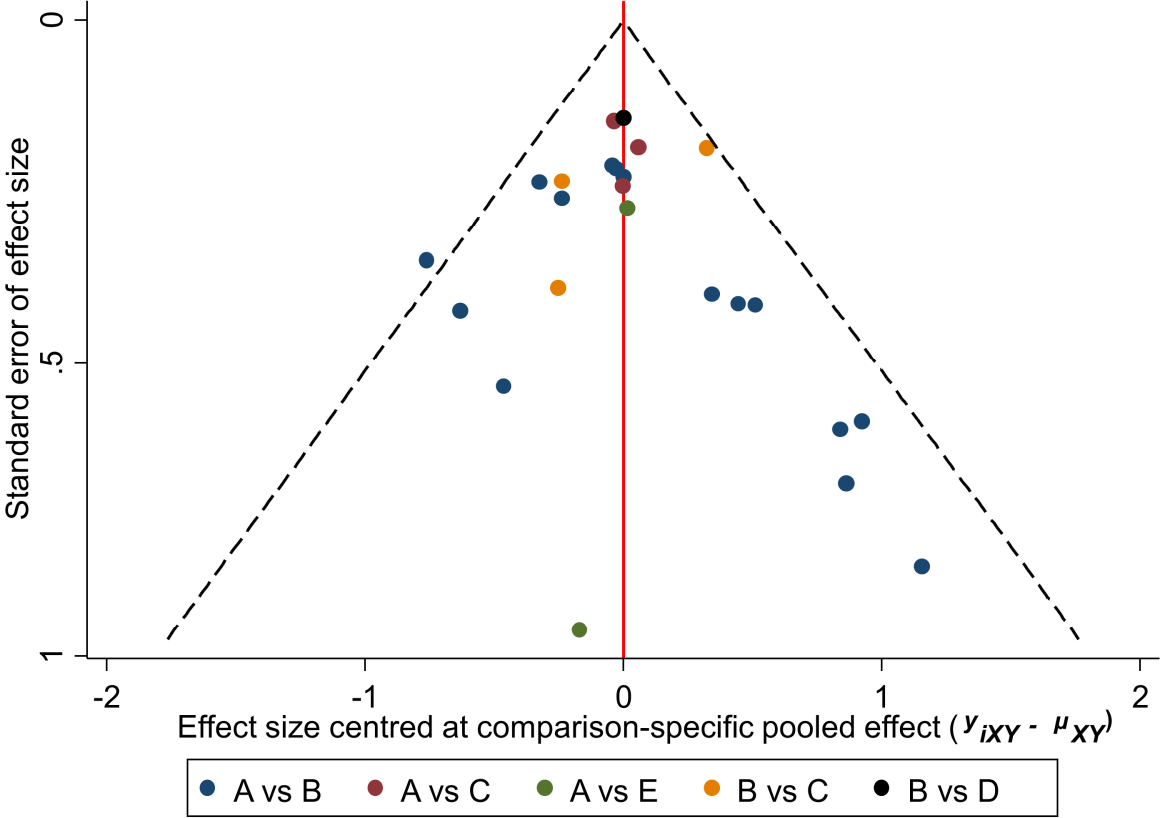

**Supplementary figure 9b.** Comparison adjusted funnel plot for the outcome of death. A= UFH+GPI; B=UFH; C=Bivalirudin; D=Fondaparinux; E=LMWH+GPI.

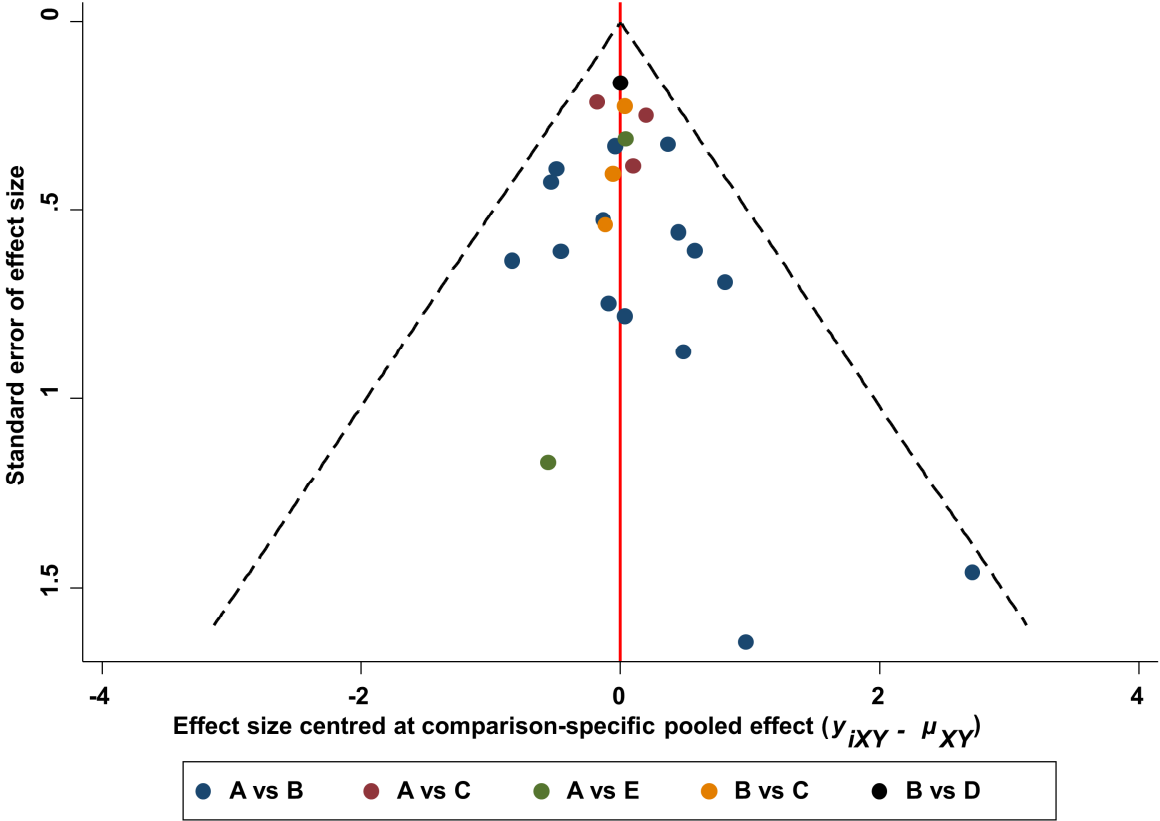

**Supplementary figure 9c.** Comparison adjusted funnel plot for the outcome of myocardial infarction. A= UFH+GPI; B=UFH; C=Bivalirudin; D=Fondaparinux; E=LMWH+GPI

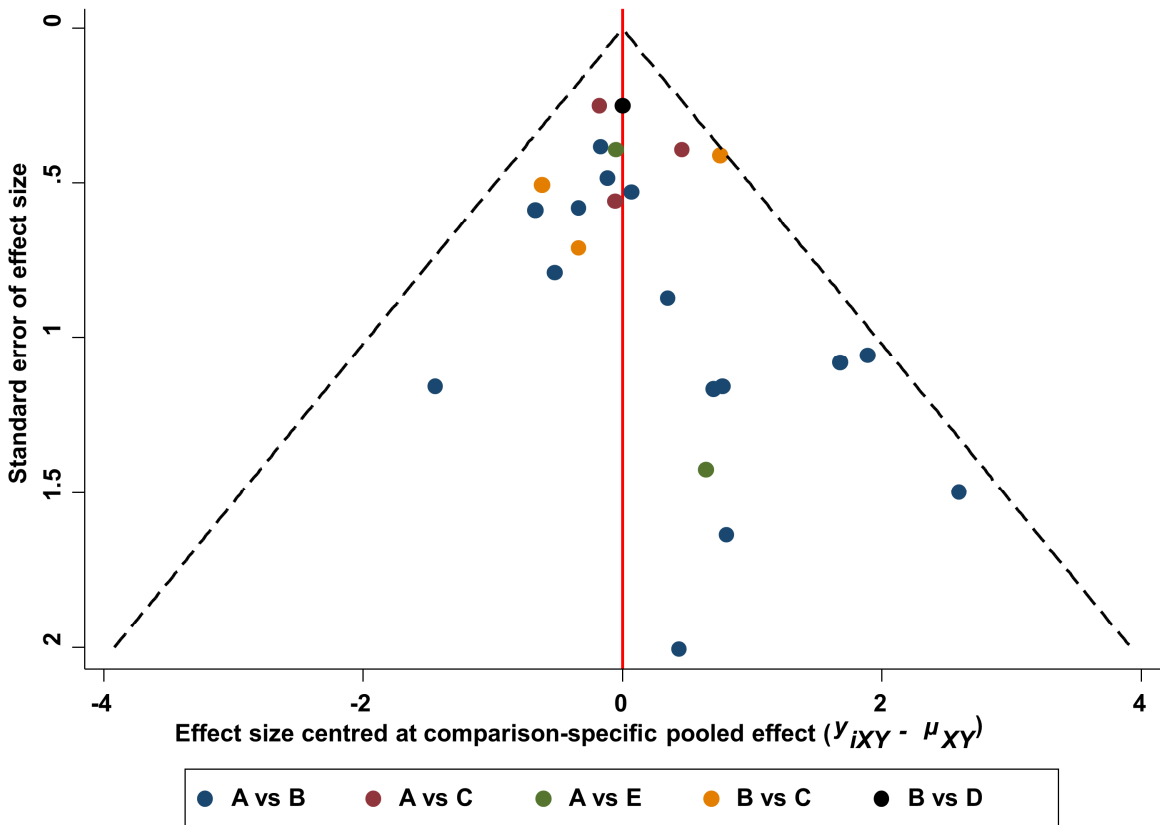





**Supplementary figure 9e.** Comparison adjusted funnel plot for the outcome of major bleeding. A= UFH+GPI; B=UFH; C=Bivalirudin; D=Fondaparinux; E=LMWH+GPI

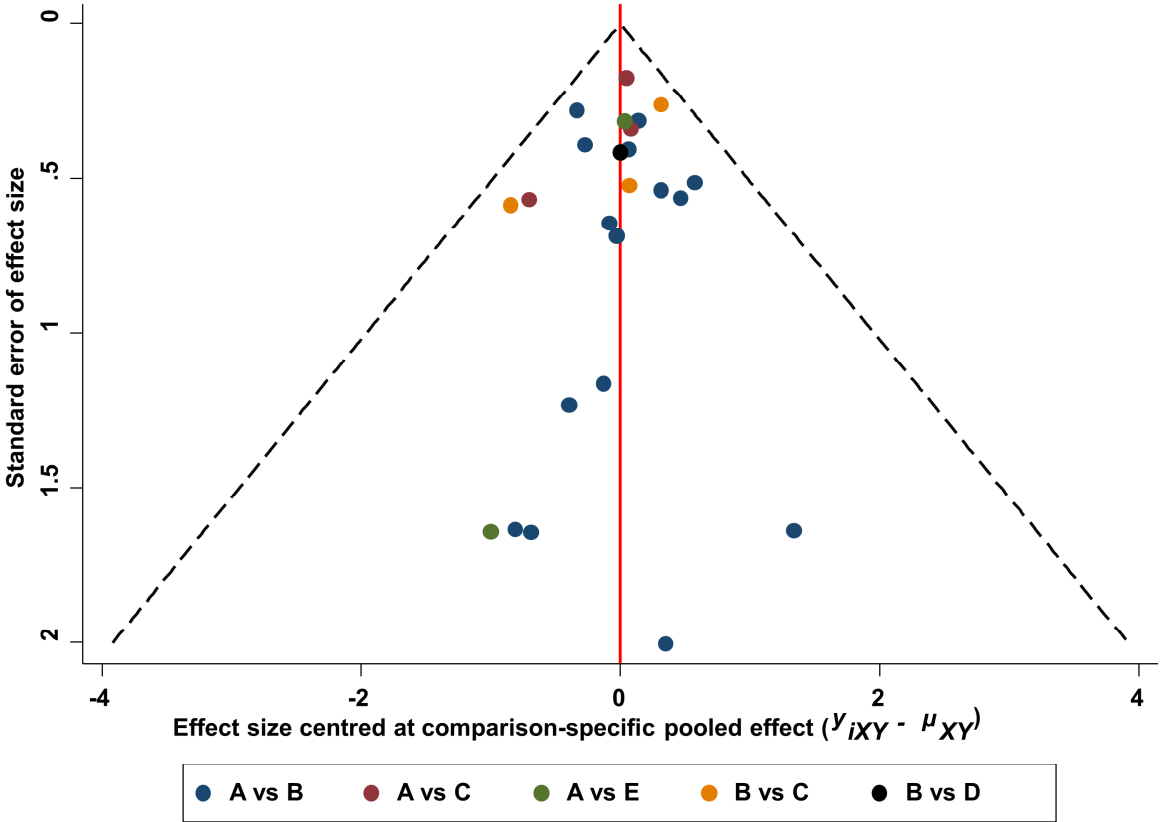

**Supplementary figure 10.** Relationship between newer P2Y12 inhibitor use and the relative risk for major bleeding with bivalirudin when compared with UFH with or without GPI.

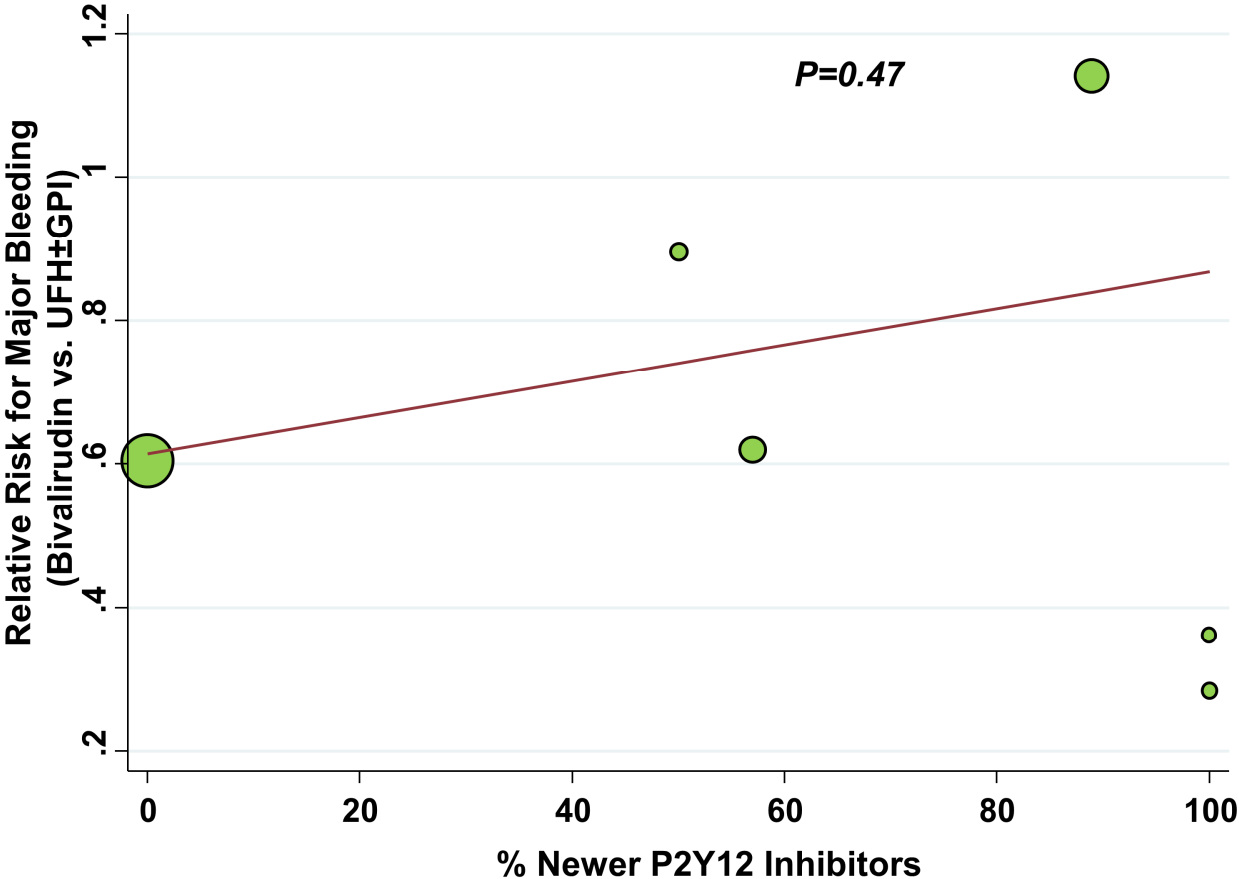

**Supplementary figure 11.** Relationship between access site and the relative risk for major bleeding with bivalirudin when compared with UFH with or without GPI.

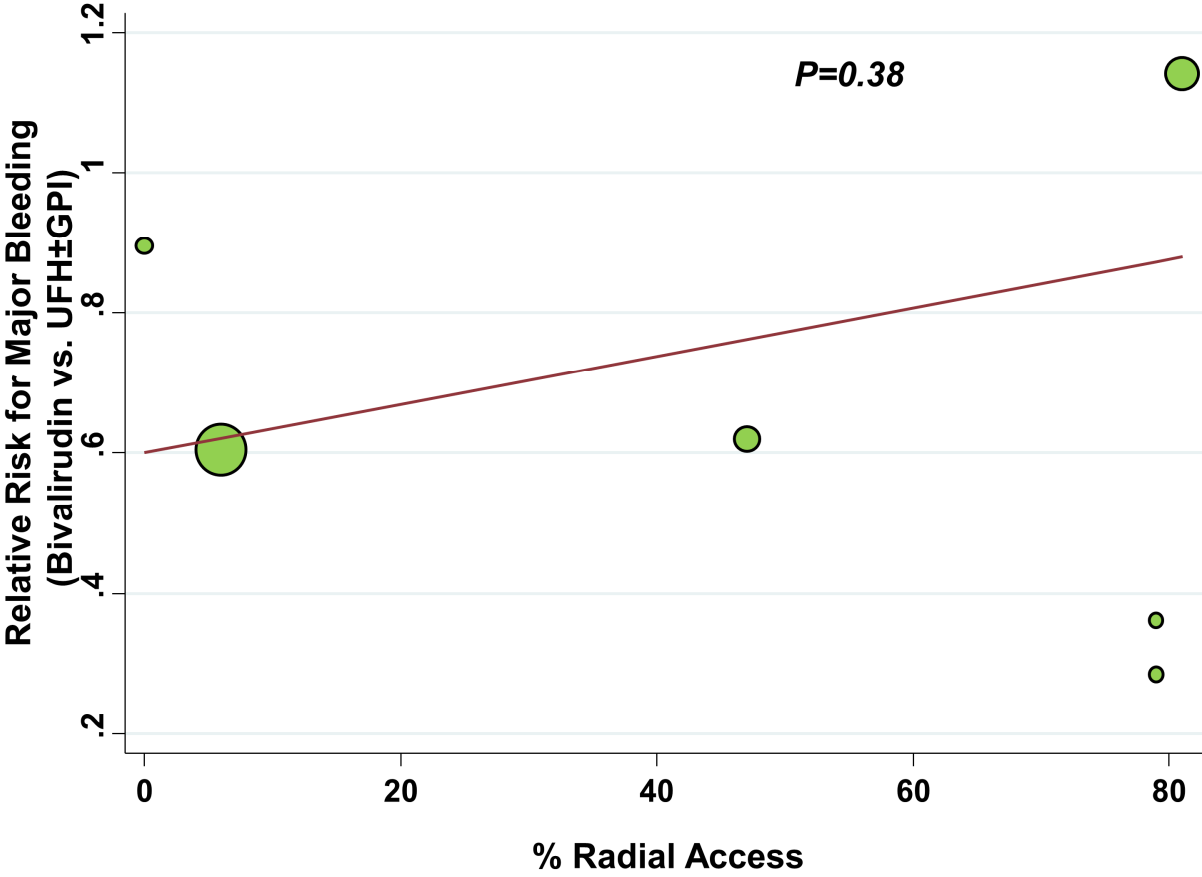

**Supplementary figure 12.** Relationship between newer P2Y12 inhibitor use and the relative risk for MACCE with bivalirudin when compared with UFH with or without GPI.

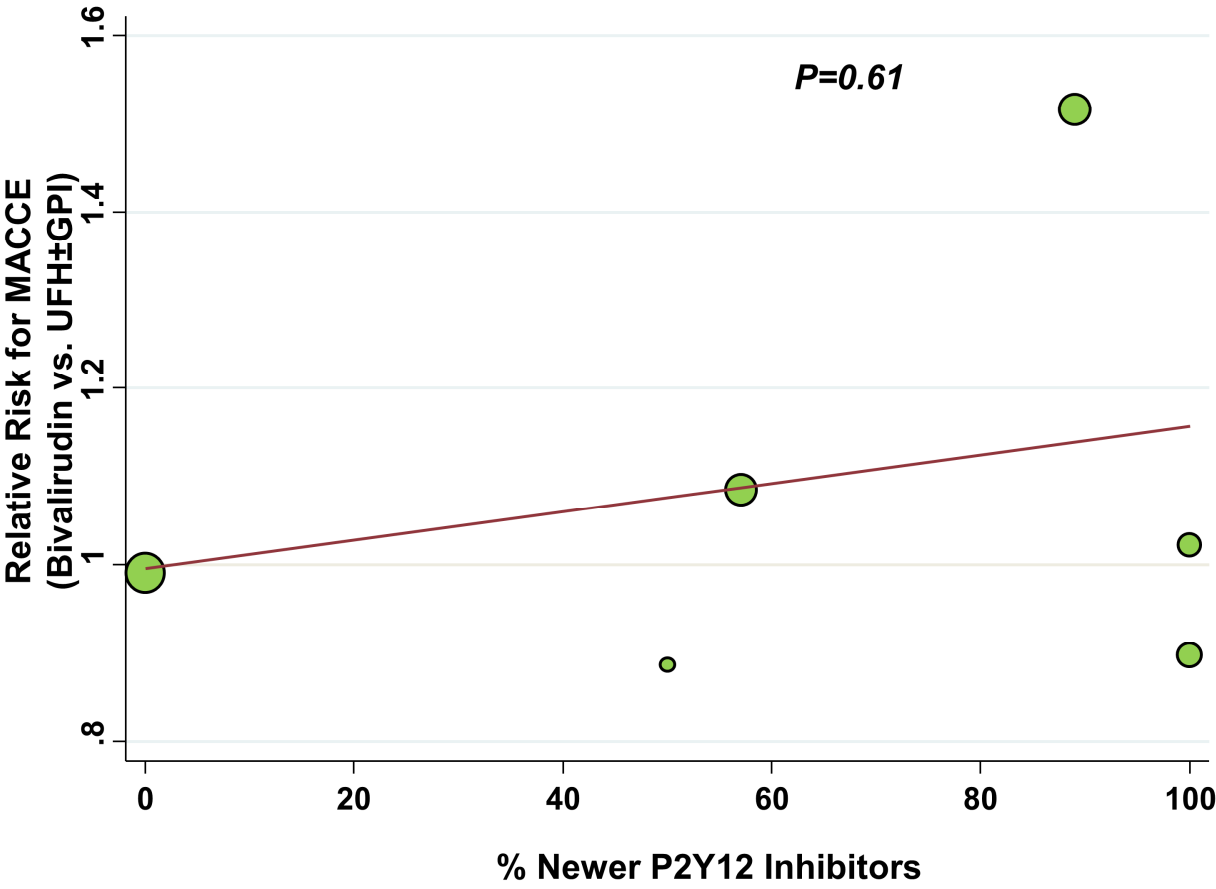

Supplement: bans021664.w1_default.pdf [file bans021664.w1_default.pdf]
